# Supplementary material for: Synthesis and biological evaluation of ursolic acid derivatives bearing triazole moieties as potential anti-Toxoplasma gondii agents
Source: PubMed Central journal article supplement (PMC6407578; doi:10.1080/14756366.2019.1584622), 2019-03-05
Supplement: IENZ_A_1584622_SM1592.pdf [file IENZ_A_1584622_SM1592.pdf]

## Supplementary File

### Synthesis and biological evaluation of ursolic acid derivatives bearing triazole moieties as potential anti-*Toxoplasma gondii* agents

Tian Luan<sup>a#</sup>, Chunmei Jin<sup>a#</sup>, Chun-Mei Jin<sup>a\*</sup>, Guo-Hua Gong<sup>b,c\*</sup> & Zhe-Shan Quan<sup>a\*</sup>

<sup>a</sup>Key Laboratory of Natural Resources and Functional Molecules of the Changbai Mountain, Affiliated Ministry of Education, College of Pharmacy, Yanbian University, Yanji, Jilin, 133002, China

<sup>b</sup>First Clinical Medical College of Inner Mongolia University for Nationalities, Tongliao, P.R. China

<sup>c</sup>Inner Mongolia Key Laboratory of Mongolian Medicine Pharmacology for Cardio-Cerebral Vascular System, Inner Mongolia University for Nationalities, Tongliao, P.R. China

**\*Corresponding author: Tel: + 86 433 243-6020; Fax: + 86 433 243-6020.**

**E-mail: [zsquan@ybu.edu.cn](mailto:zsquan@ybu.edu.cn) (Z. S. Quan).**

**\*Corresponding author: E-mail: [gongguohua0211@163.com](mailto:gongguohua0211@163.com) (G. H. Gong).**

**\*Corresponding author: E-mail: [cmjin@ybu.edu.cn](mailto:cmjin@ybu.edu.cn) (C. M. Jin).**

<sup>#</sup>These authors contributed equally to this work.

#### Table of contents:

|                                                                          |         |
|--------------------------------------------------------------------------|---------|
| <sup>1</sup> H NMR and <sup>13</sup> C NMR spectra of compound <b>1a</b> | page 3  |
| <sup>1</sup> H NMR and <sup>13</sup> C NMR spectra of compound <b>1b</b> | page 4  |
| <sup>1</sup> H NMR and <sup>13</sup> C NMR spectra of compound <b>1c</b> | page 5  |
| <sup>1</sup> H NMR and <sup>13</sup> C NMR spectra of compound <b>1d</b> | page 6  |
| <sup>1</sup> H NMR and <sup>13</sup> C NMR spectra of compound <b>1e</b> | page 7  |
| <sup>1</sup> H NMR and <sup>13</sup> C NMR spectra of compound <b>1f</b> | page 8  |
| <sup>1</sup> H NMR and <sup>13</sup> C NMR spectra of compound <b>1g</b> | page 9  |
| <sup>1</sup> H NMR and <sup>13</sup> C NMR spectra of compound <b>1h</b> | page 10 |
| <sup>1</sup> H NMR and <sup>13</sup> C NMR spectra of compound <b>1i</b> | page 11 |

|                                                                          |         |
|--------------------------------------------------------------------------|---------|
| <sup>1</sup> H NMR and <sup>13</sup> C NMR spectra of compound <b>1j</b> | page 12 |
| <sup>1</sup> H NMR and <sup>13</sup> C NMR spectra of compound <b>2a</b> | page 13 |
| <sup>1</sup> H NMR and <sup>13</sup> C NMR spectra of compound <b>2b</b> | page 14 |
| <sup>1</sup> H NMR and <sup>13</sup> C NMR spectra of compound <b>2c</b> | page 15 |
| <sup>1</sup> H NMR and <sup>13</sup> C NMR spectra of compound <b>2d</b> | page 16 |
| <sup>1</sup> H NMR and <sup>13</sup> C NMR spectra of compound <b>2e</b> | page 17 |
| <sup>1</sup> H NMR and <sup>13</sup> C NMR spectra of compound <b>3a</b> | page 18 |
| <sup>1</sup> H NMR and <sup>13</sup> C NMR spectra of compound <b>3b</b> | page 19 |
| <sup>1</sup> H NMR and <sup>13</sup> C NMR spectra of compound <b>3c</b> | page 20 |
| <sup>1</sup> H NMR and <sup>13</sup> C NMR spectra of compound <b>3d</b> | page 21 |
| <sup>1</sup> H NMR and <sup>13</sup> C NMR spectra of compound <b>3e</b> | page 22 |
| <sup>1</sup> H-NMR spectra of intermediate <b>IIIId</b>                  | page 23 |

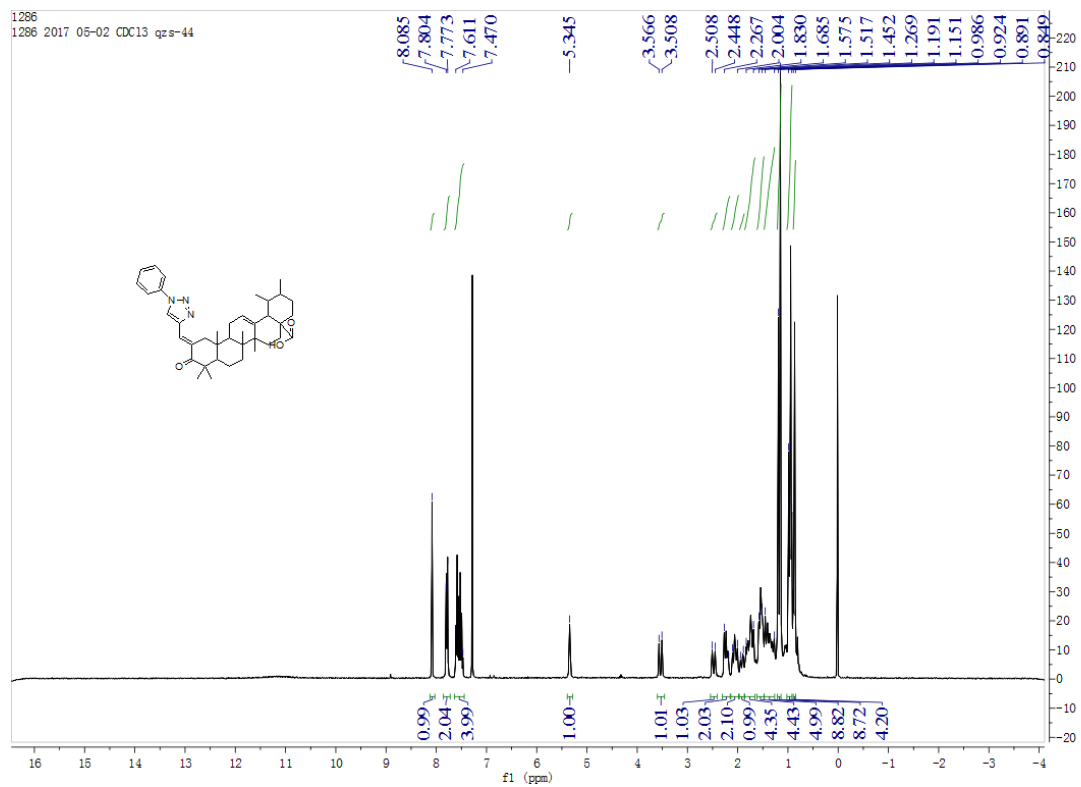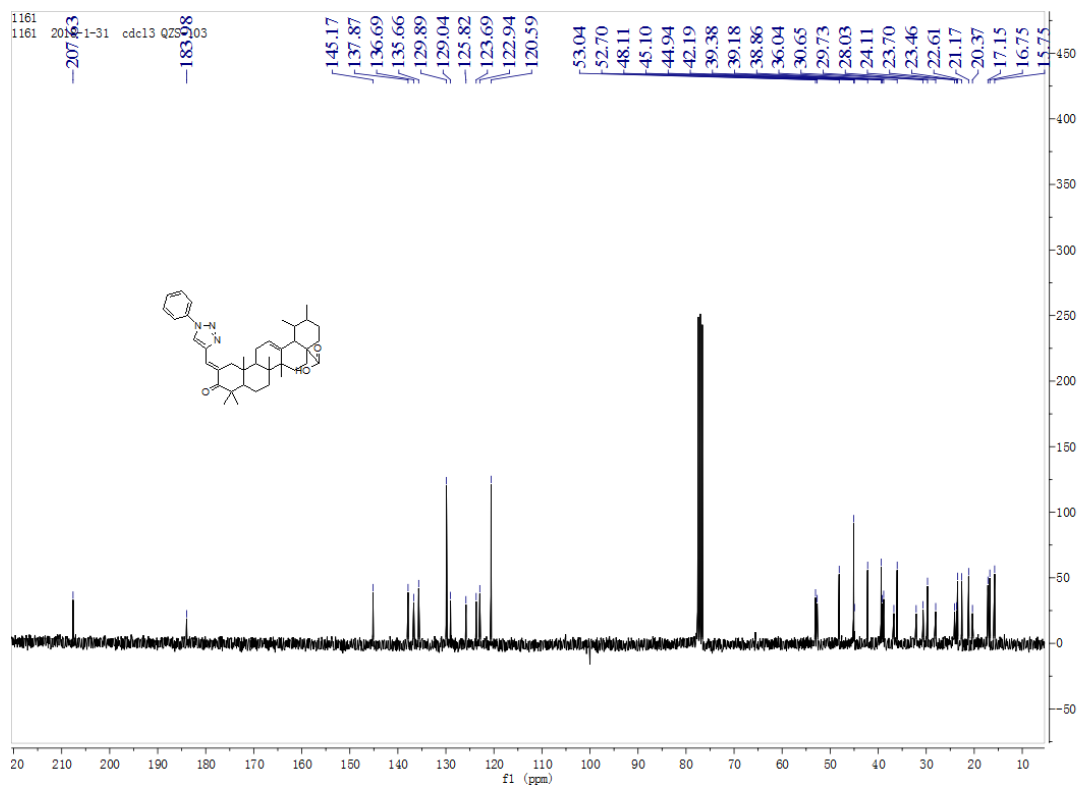

<sup>1</sup>H NMR and <sup>13</sup>C NMR spectra of compound 1a

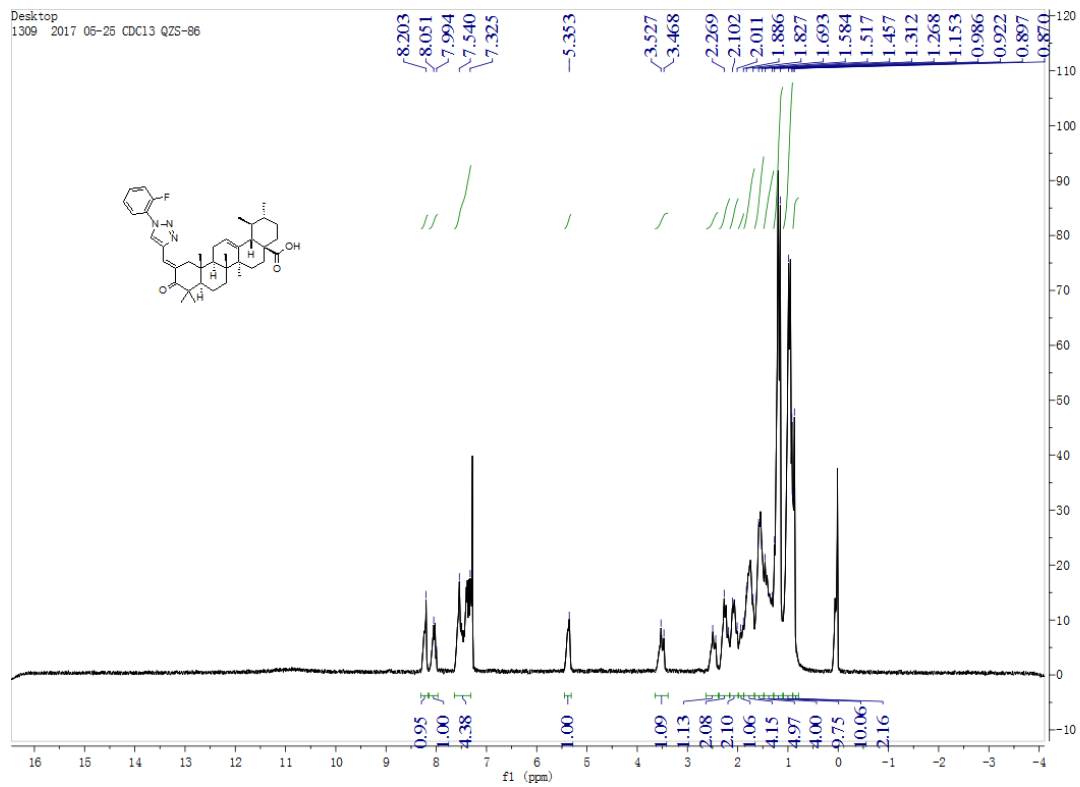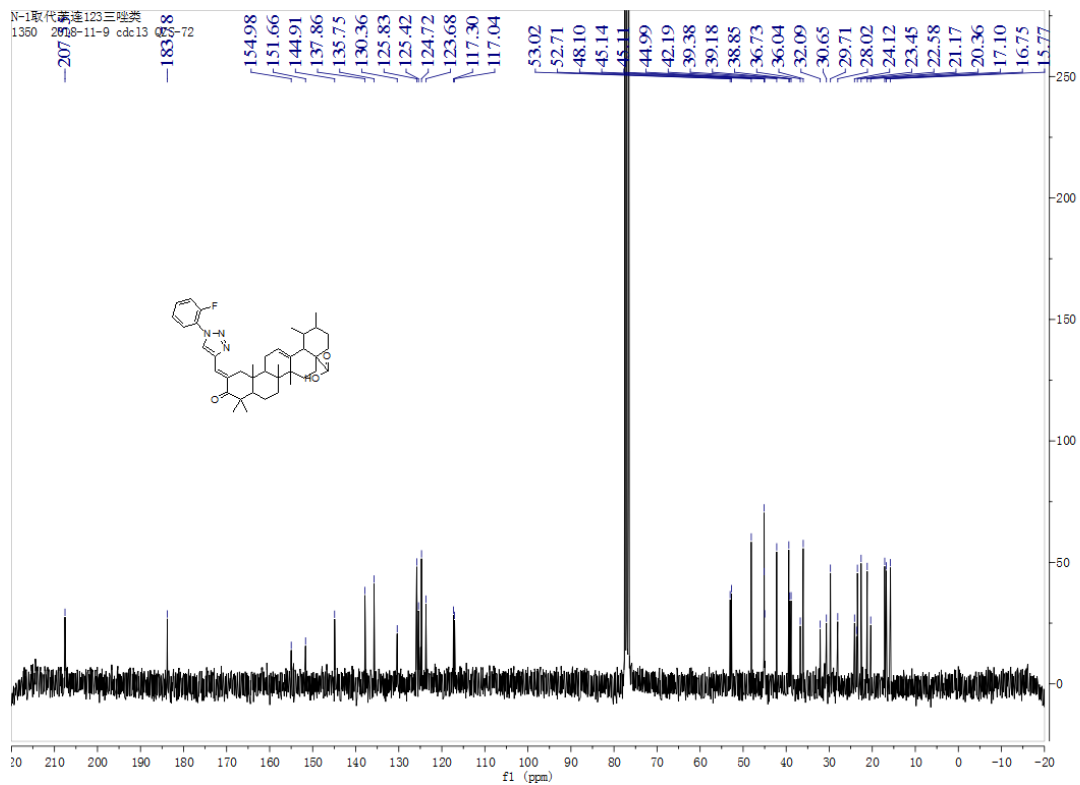

$^1\text{H}$  NMR and  $^{13}\text{C}$  NMR spectra of compound **1b**

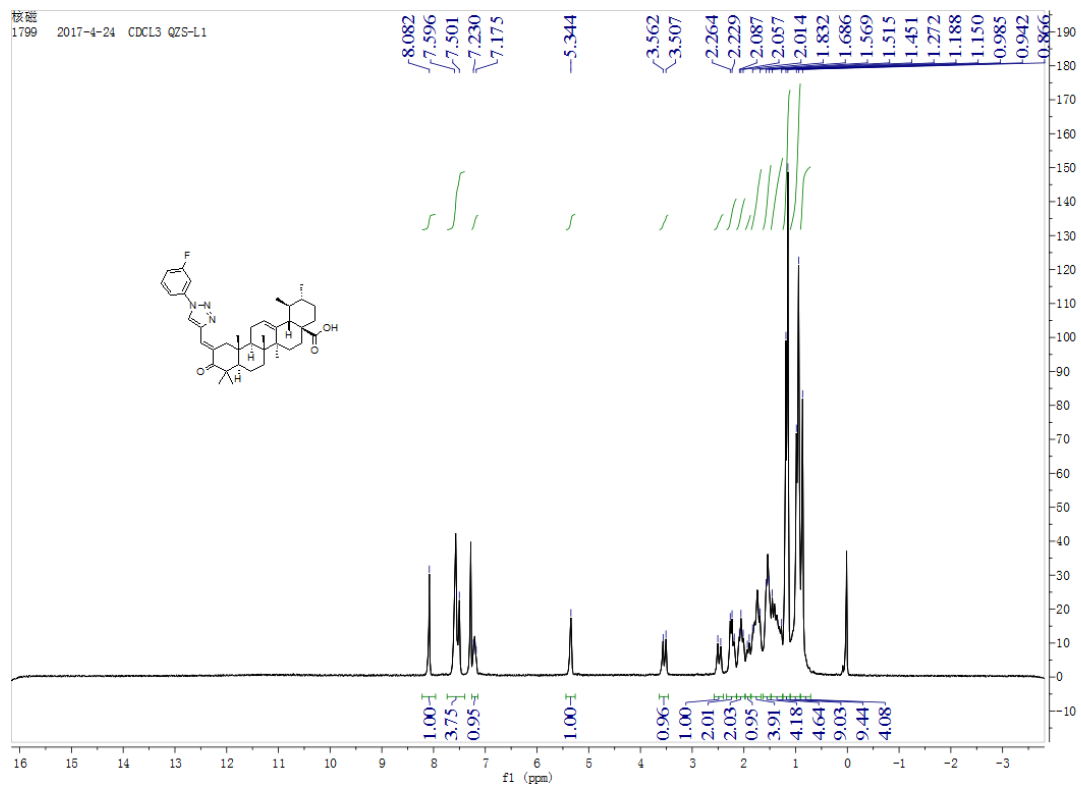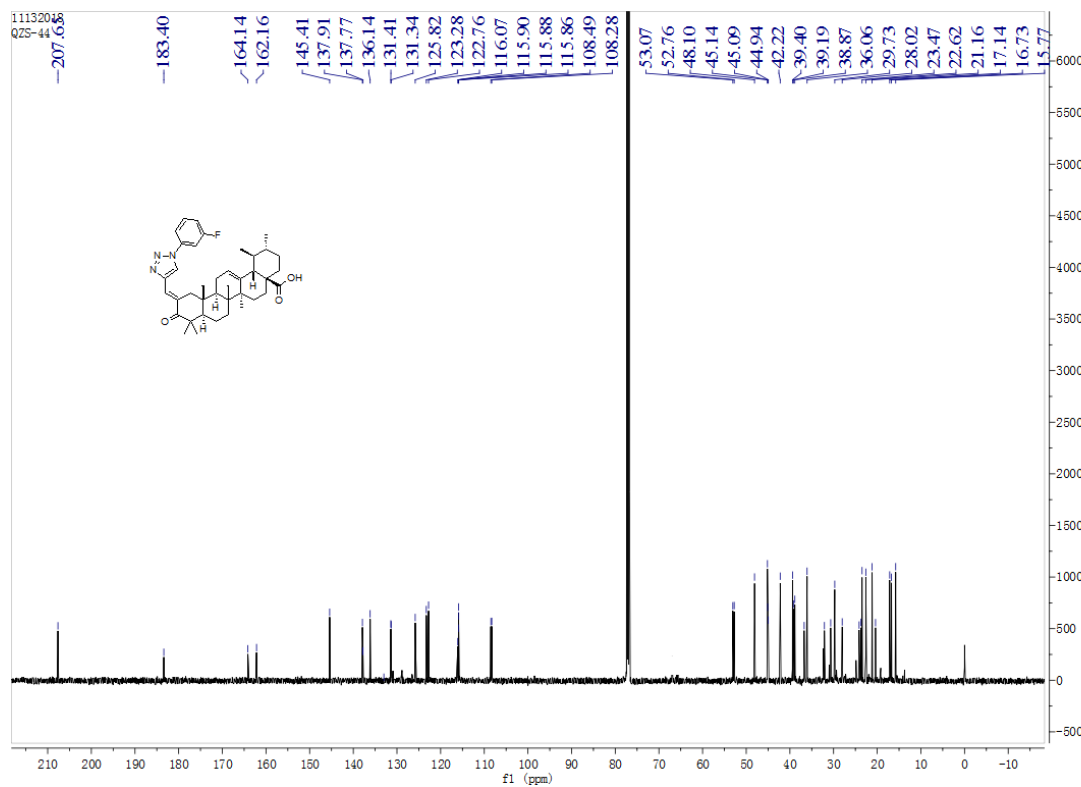

<sup>1</sup>H NMR and <sup>13</sup>C NMR spectra of compound 1c

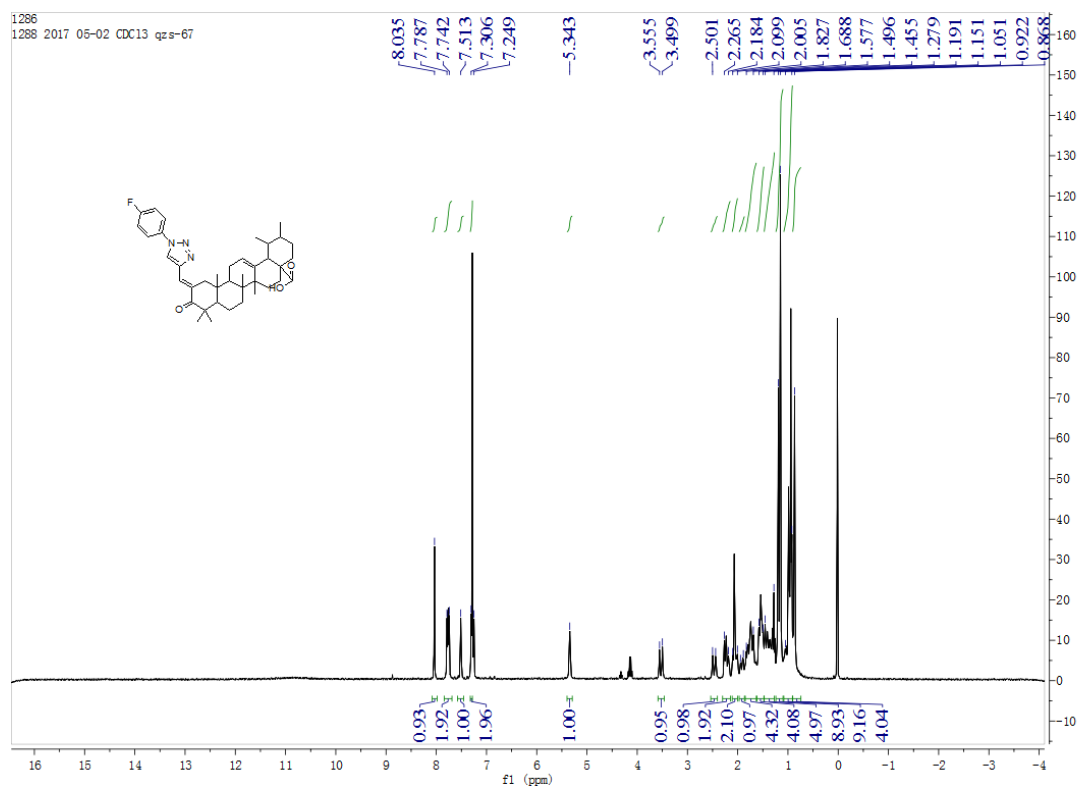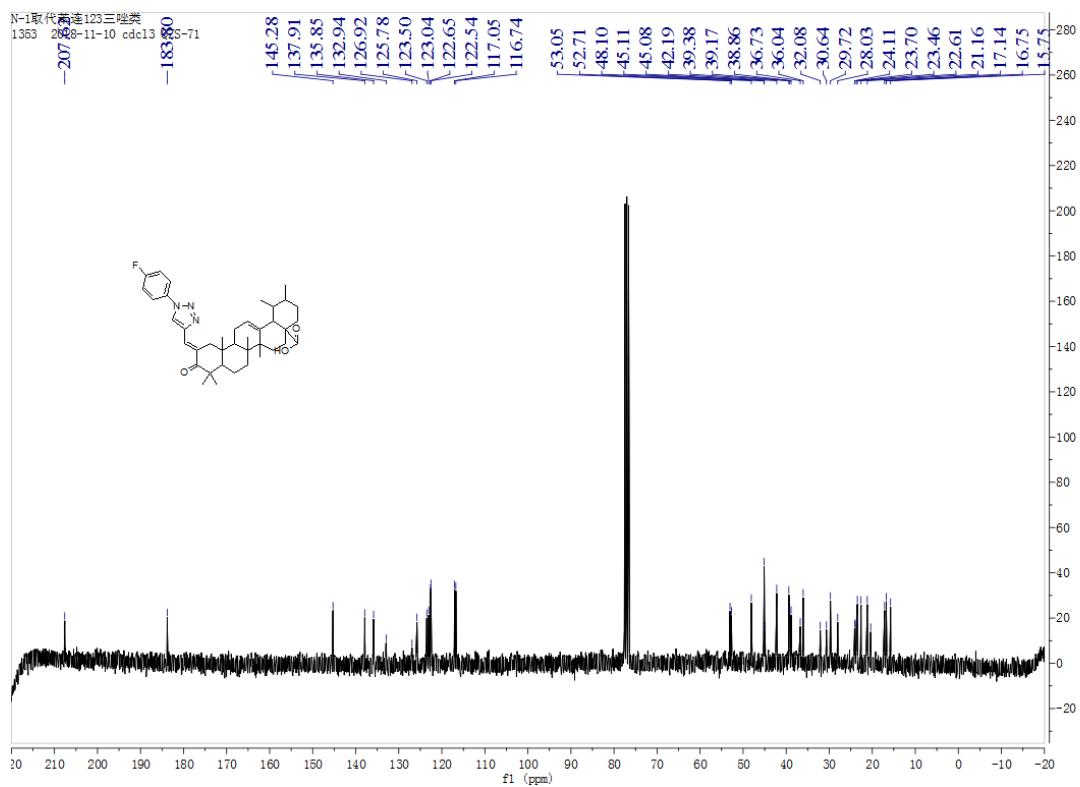

<sup>1</sup>H NMR and <sup>13</sup>C NMR spectra of compound **1d**

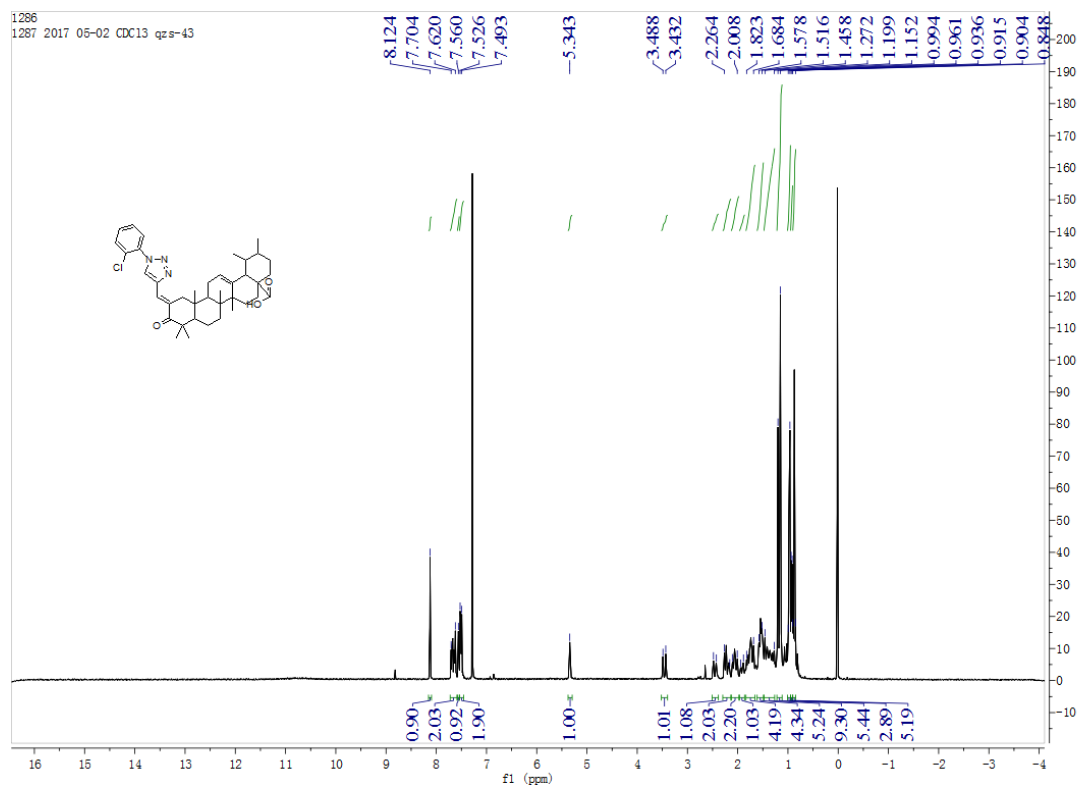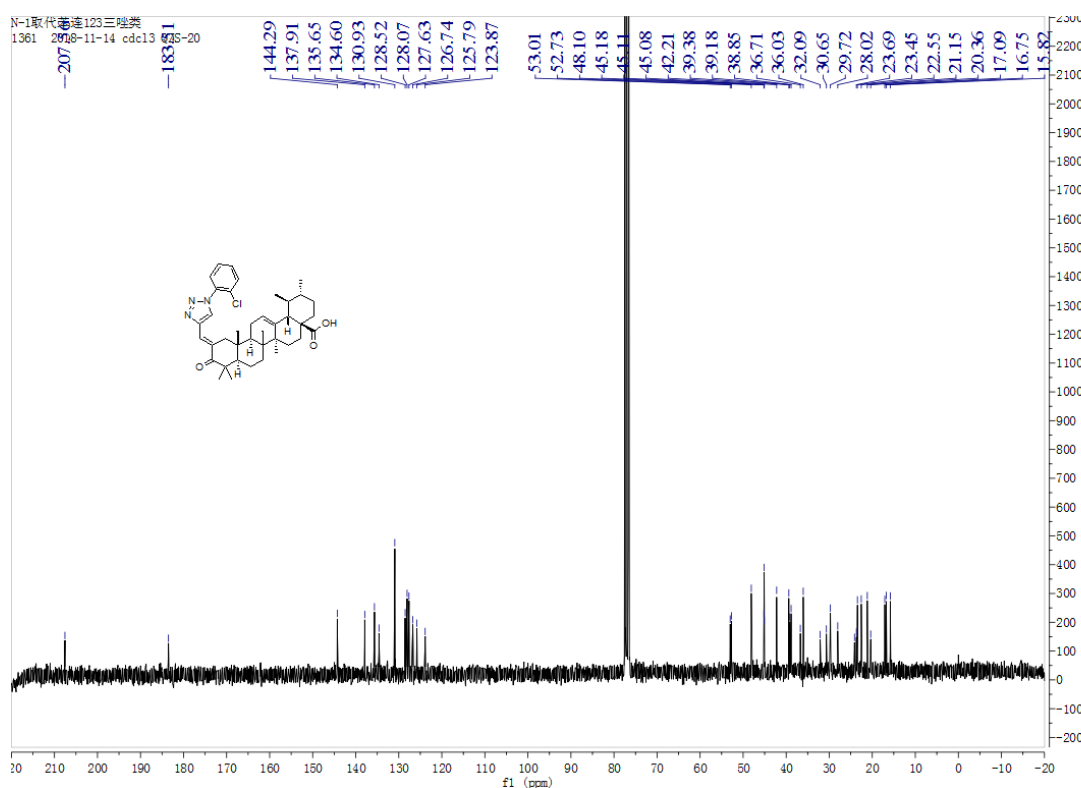

<sup>1</sup>H NMR and <sup>13</sup>C NMR spectra of compound 1e

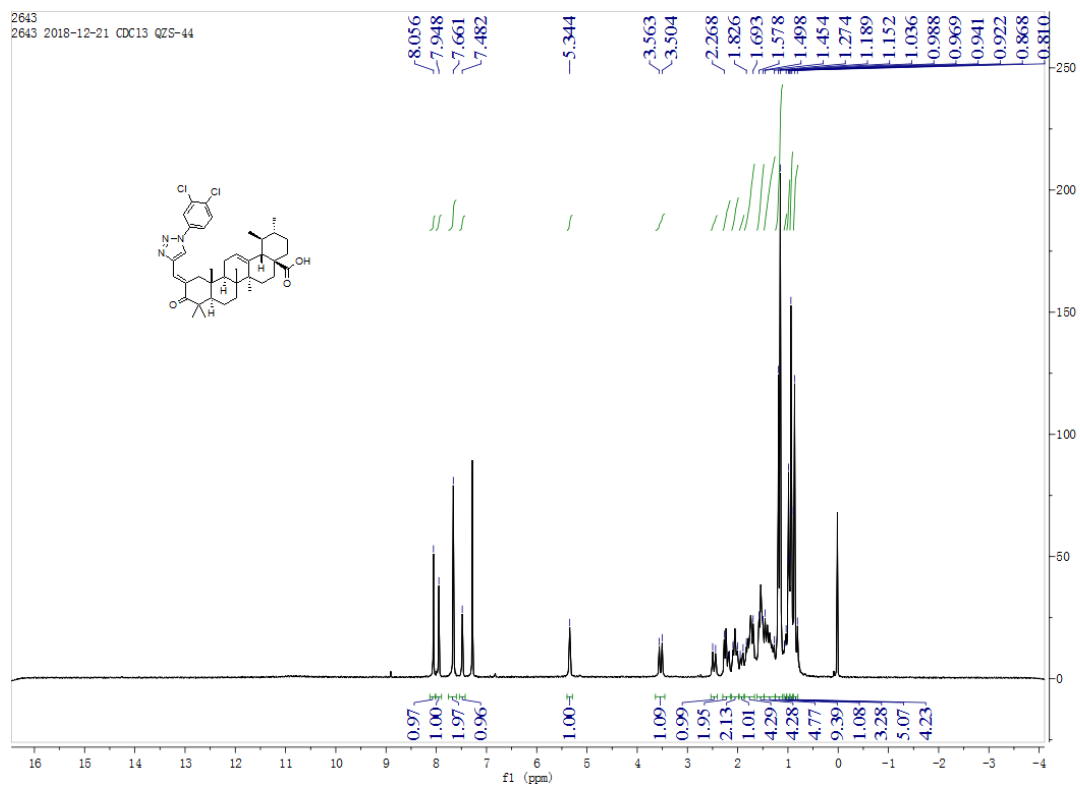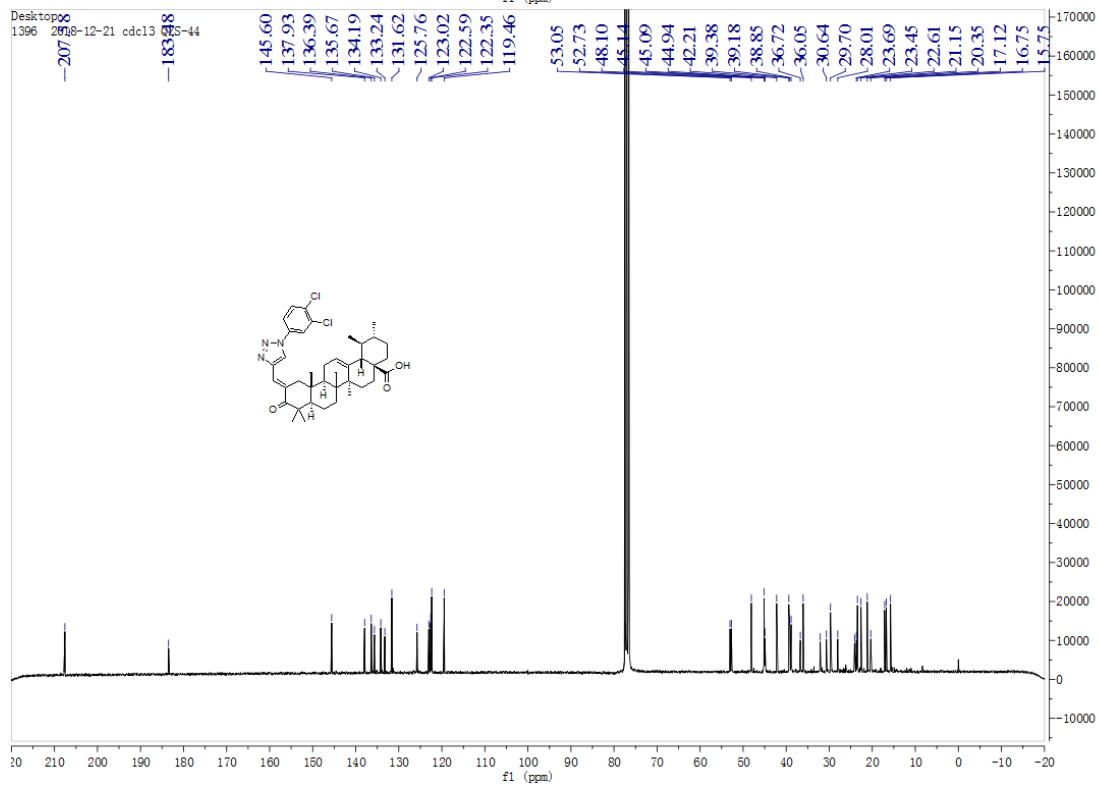

$^1\text{H}$  NMR and  $^{13}\text{C}$  NMR spectra of compound **1f**



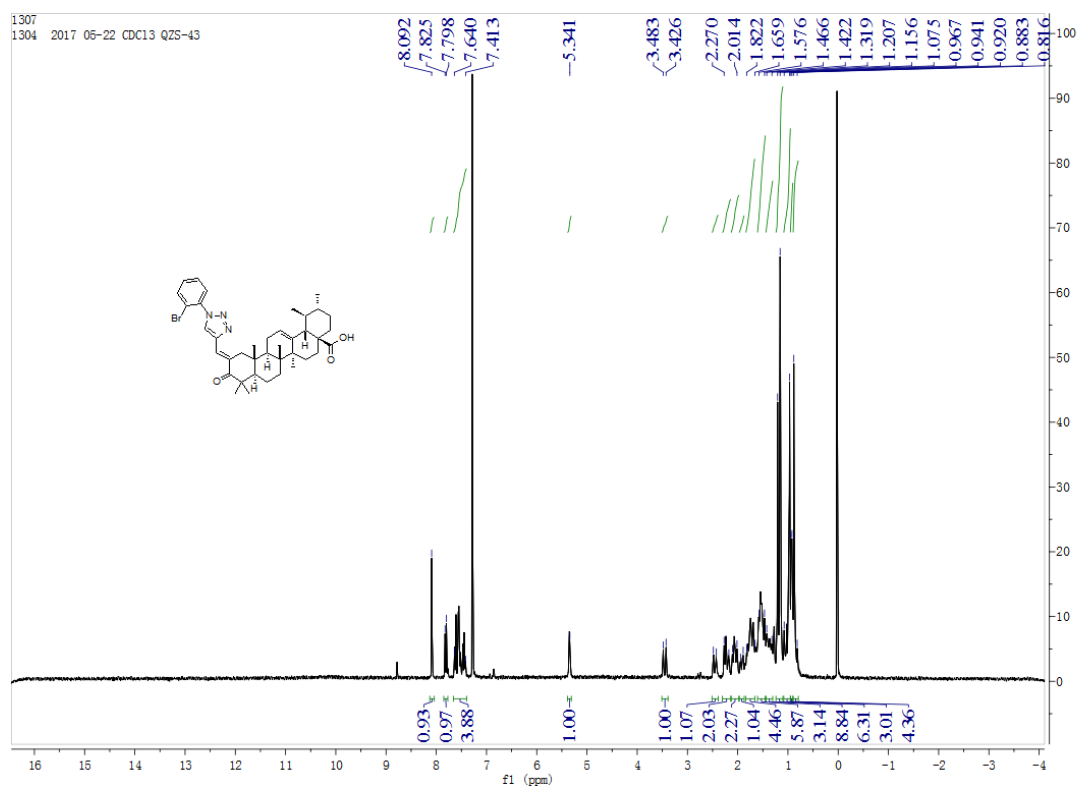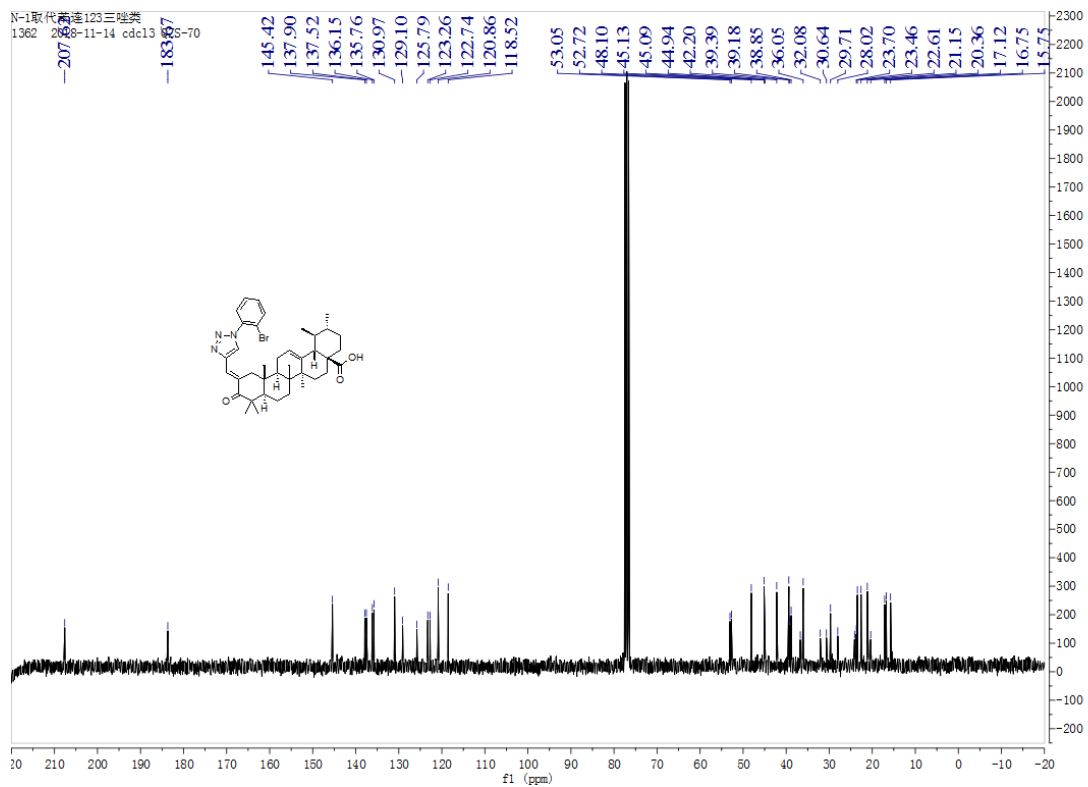

<sup>1</sup>H NMR and <sup>13</sup>C NMR spectra of compound **1g**

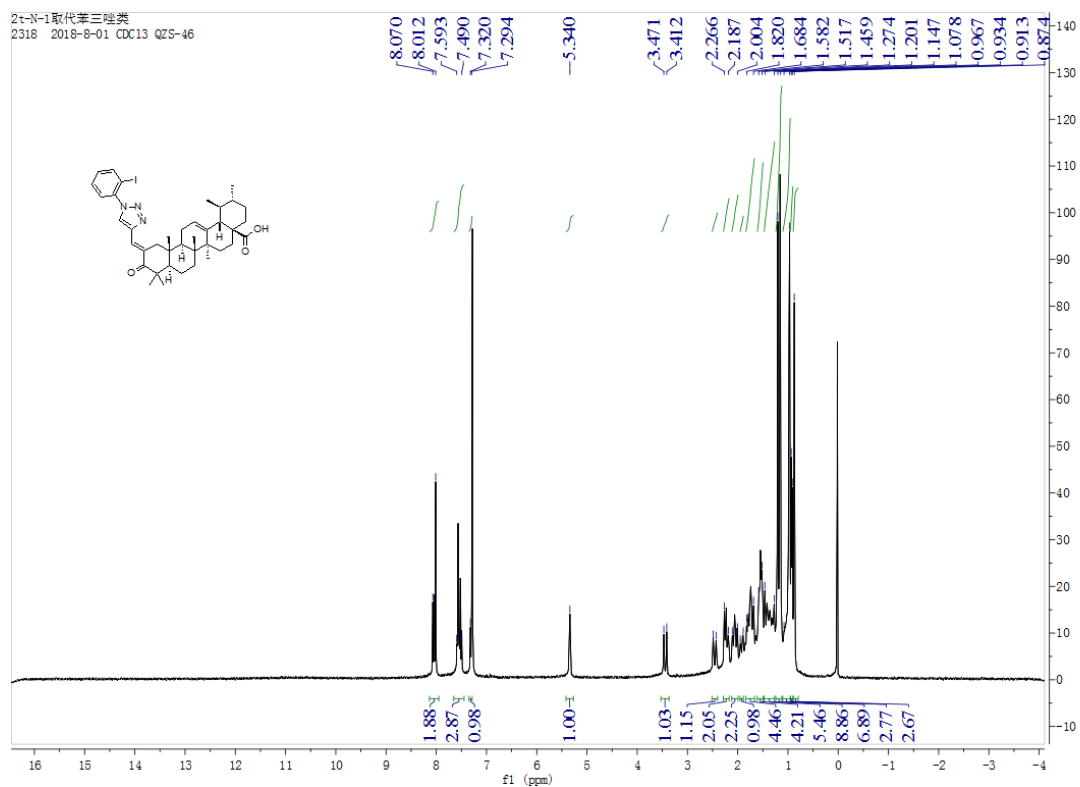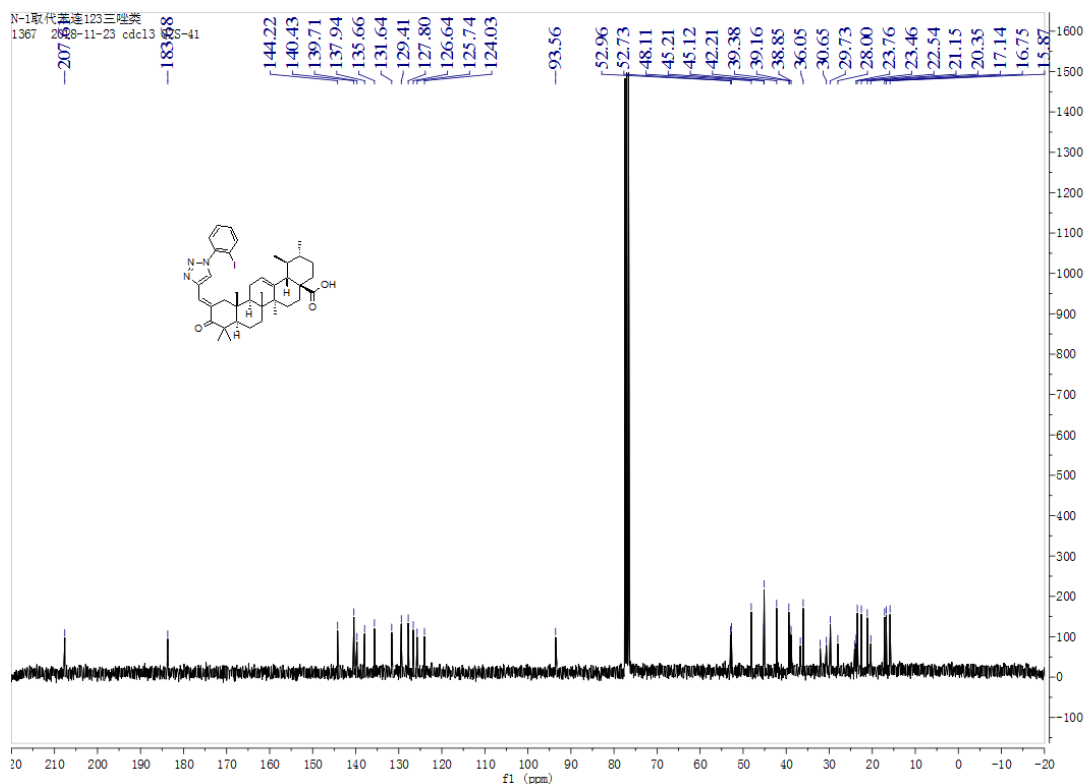

$^1\text{H}$  NMR and  $^{13}\text{C}$  NMR spectra of compound **1h**

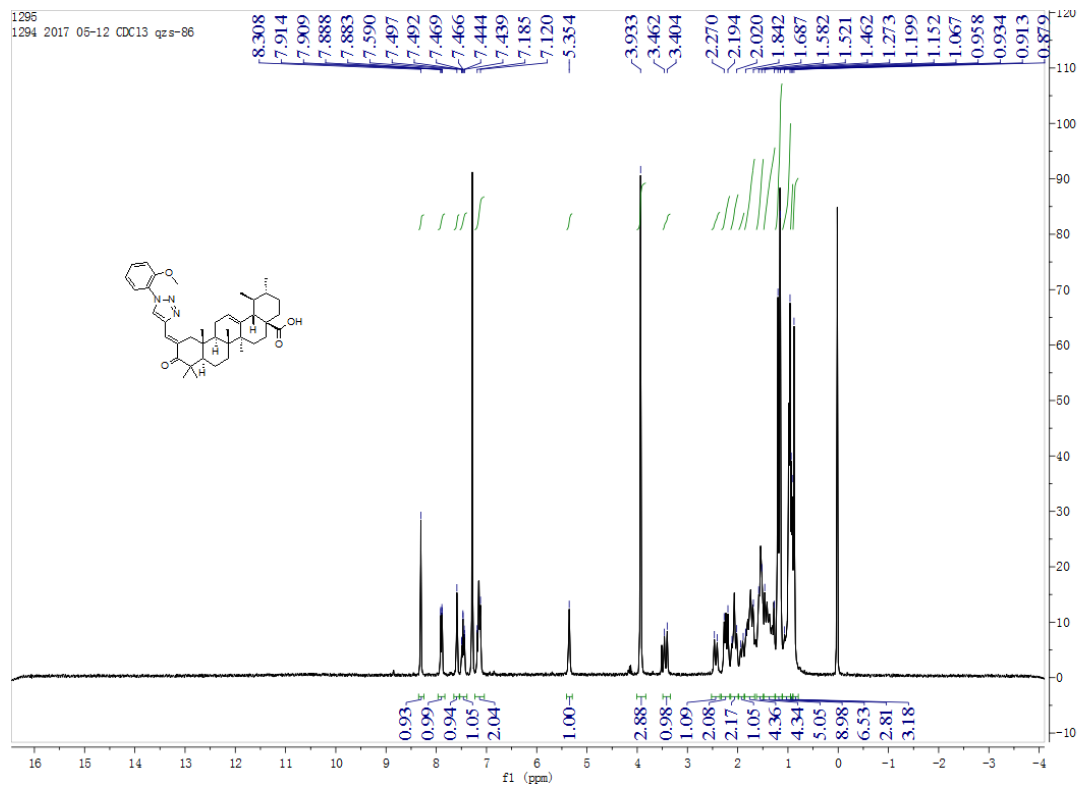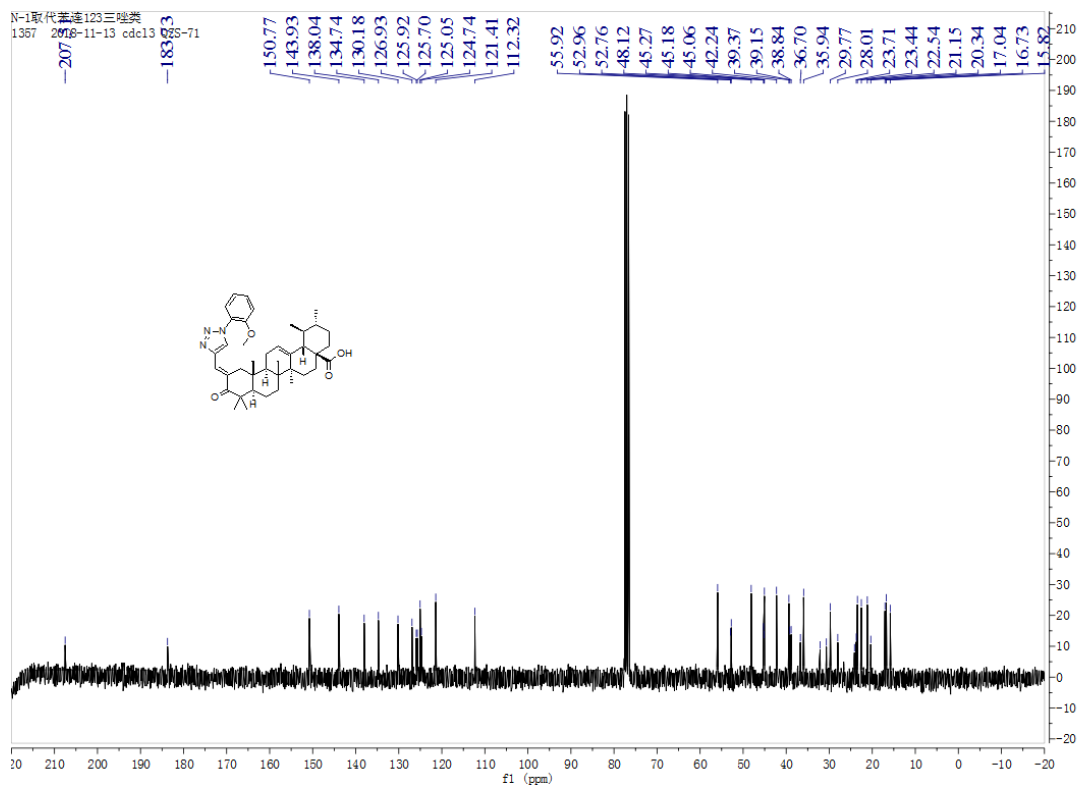

$^1\text{H}$  NMR and  $^{13}\text{C}$  NMR spectra of compound **1i**

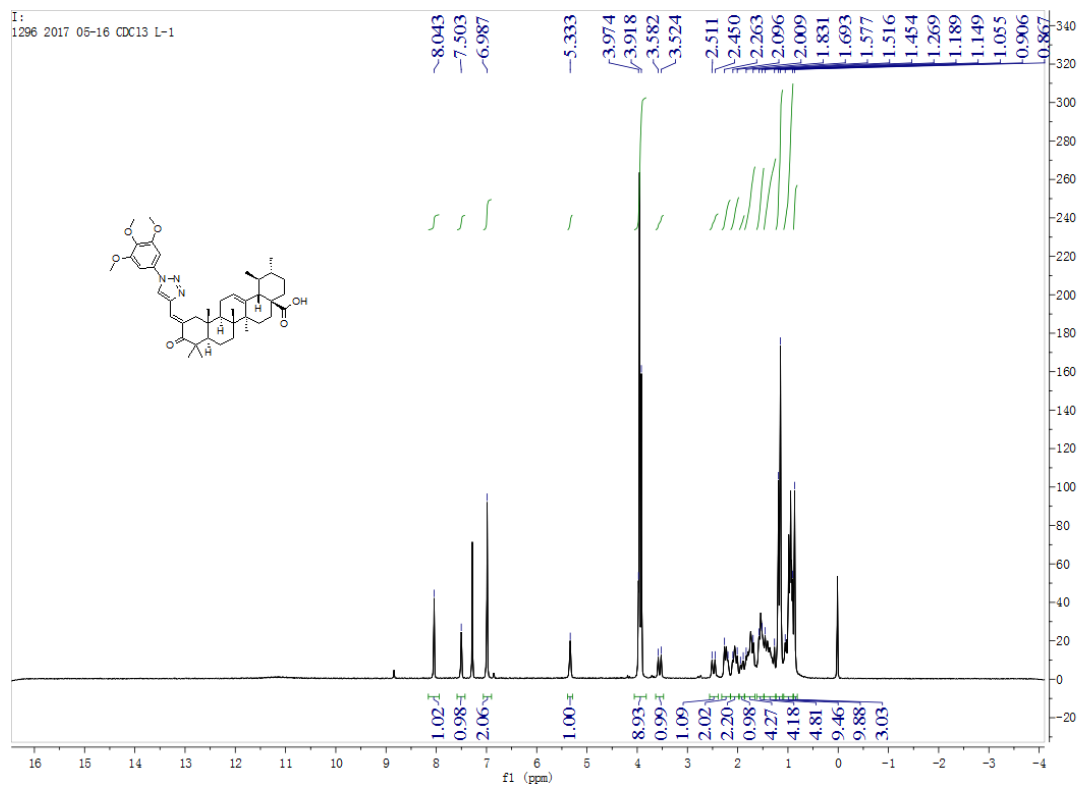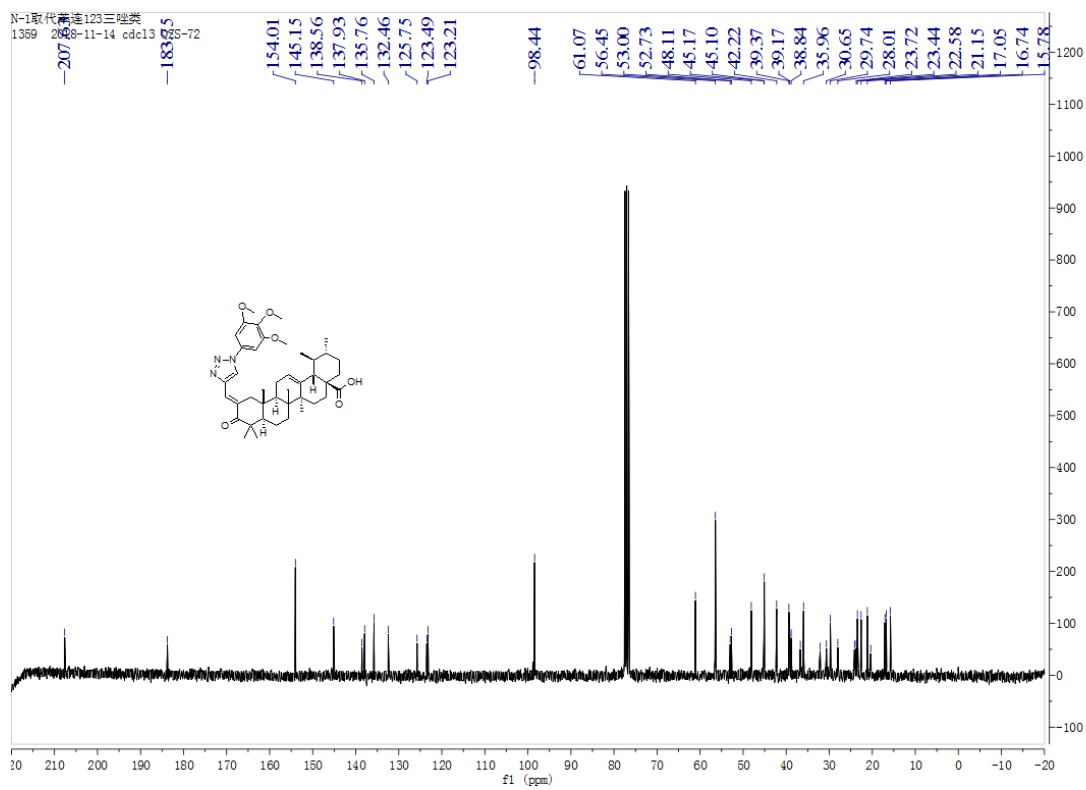

$^1\text{H}$  NMR and  $^{13}\text{C}$  NMR spectra of compound **1j**

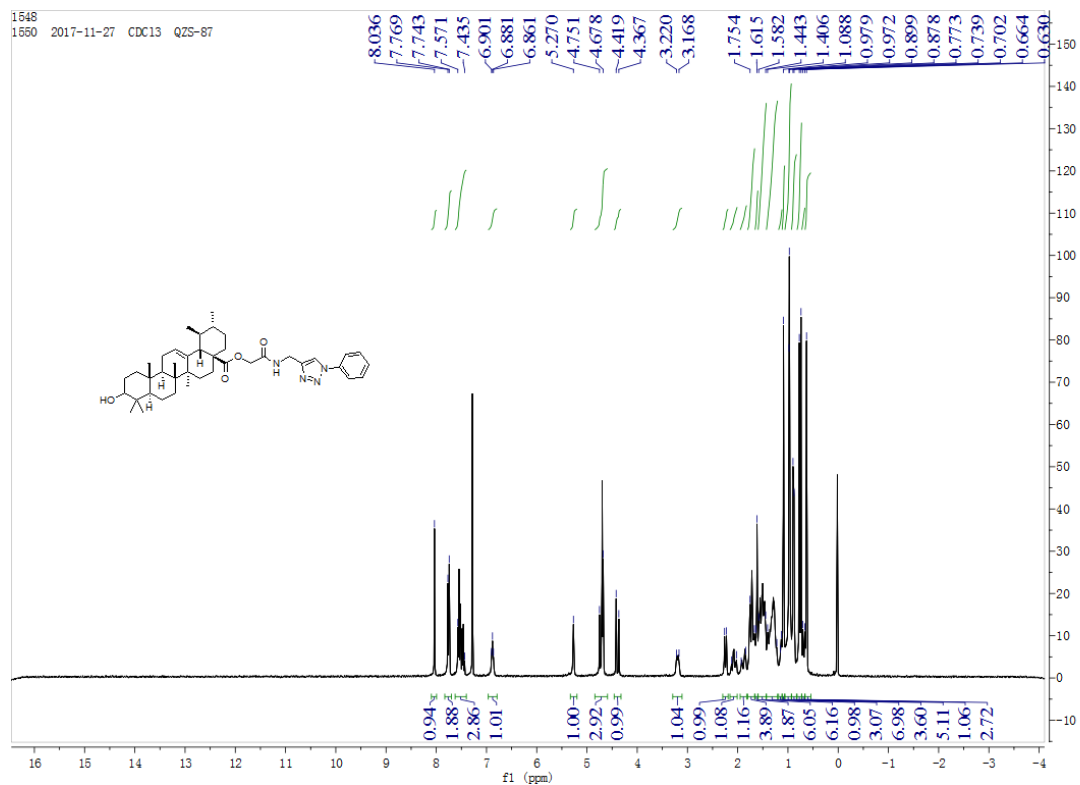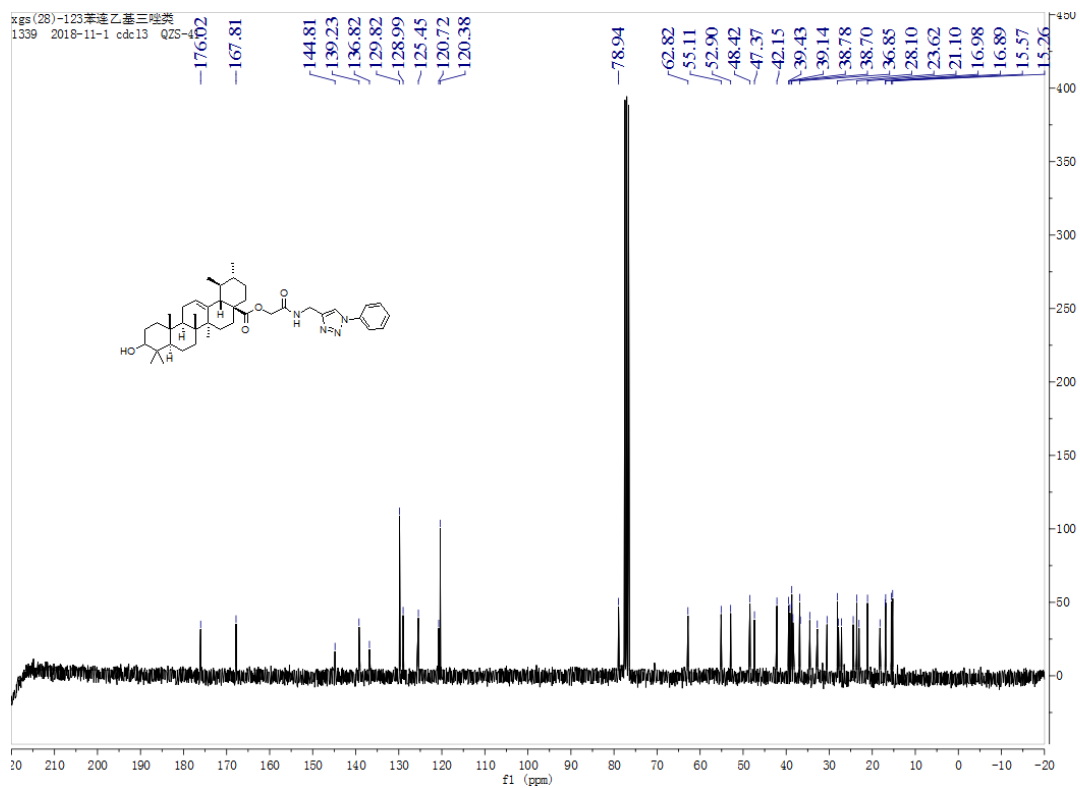

<sup>1</sup>H NMR and <sup>13</sup>C NMR spectra of compound 2a

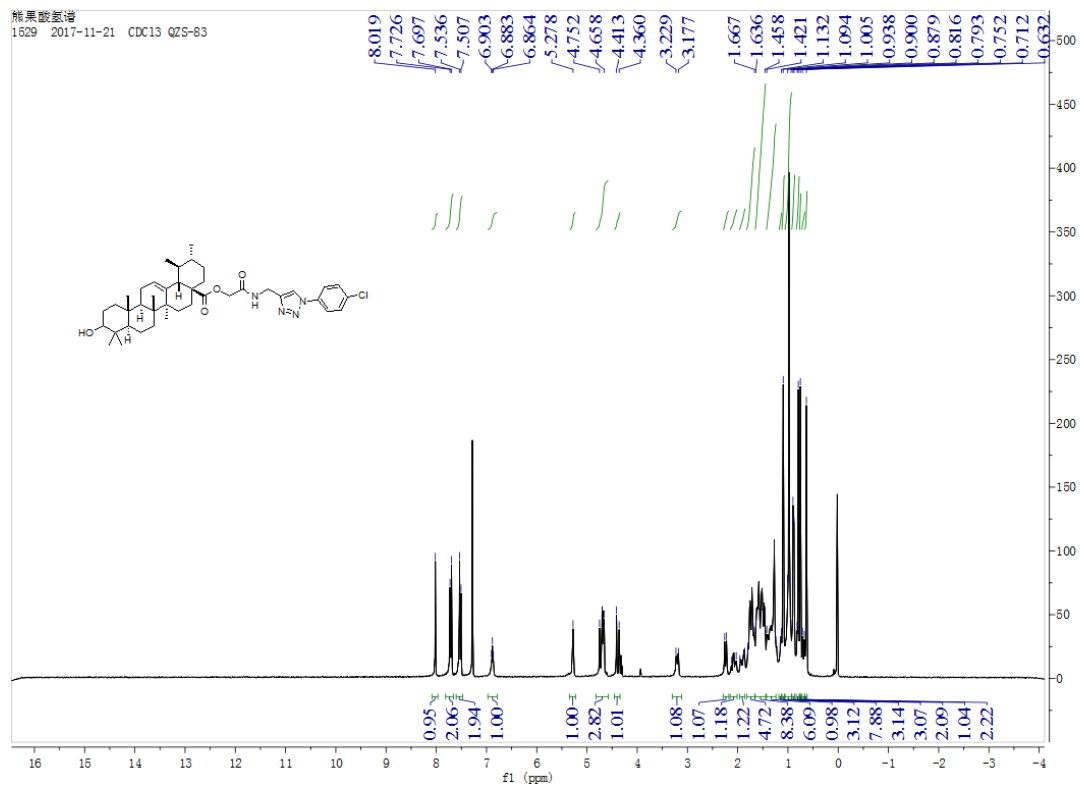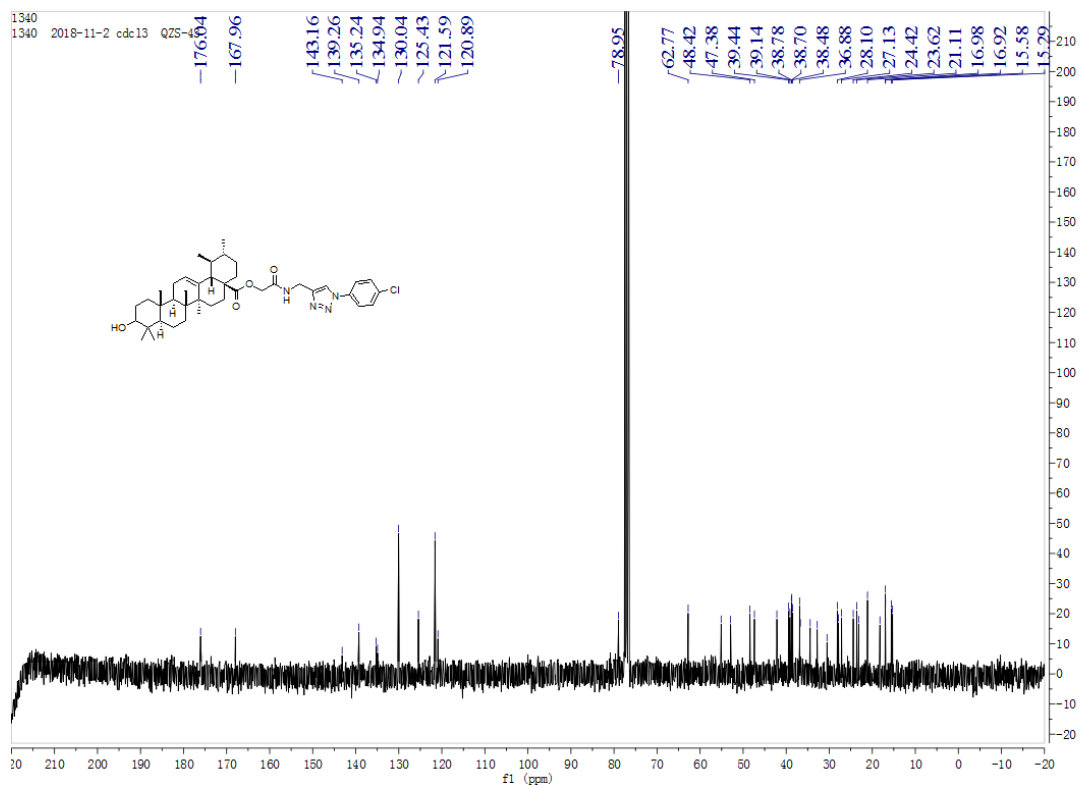

$^1\text{H}$  NMR and  $^{13}\text{C}$  NMR spectra of compound 2b

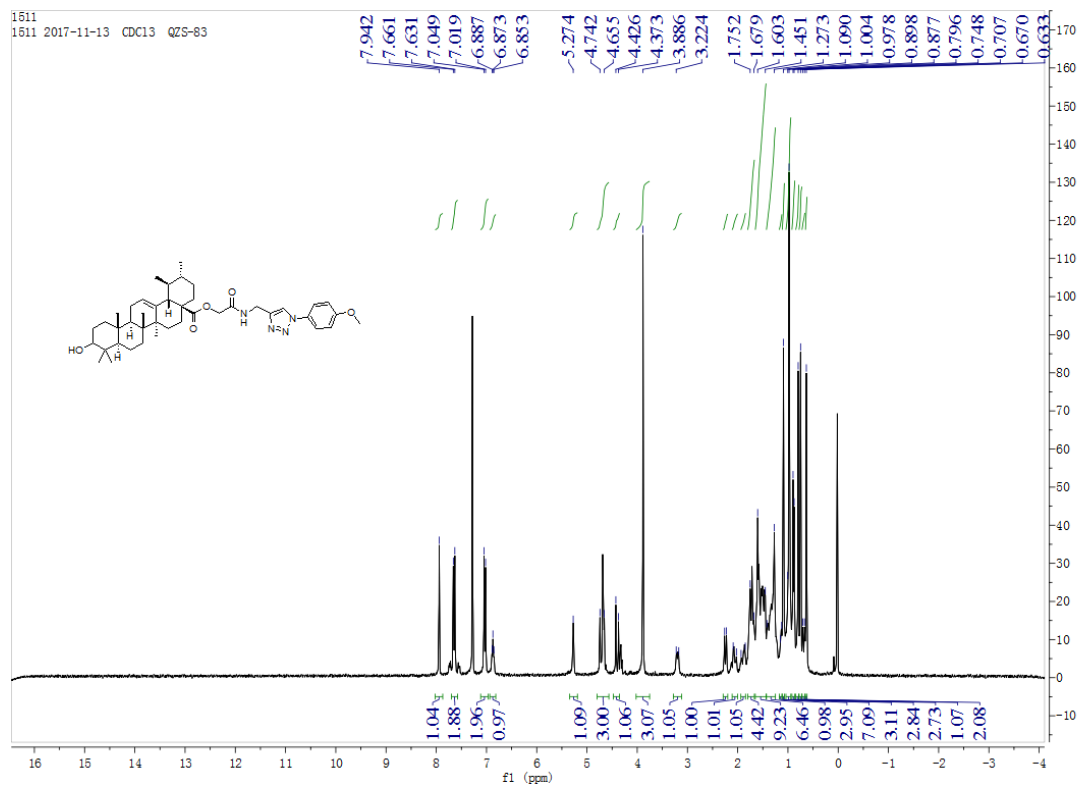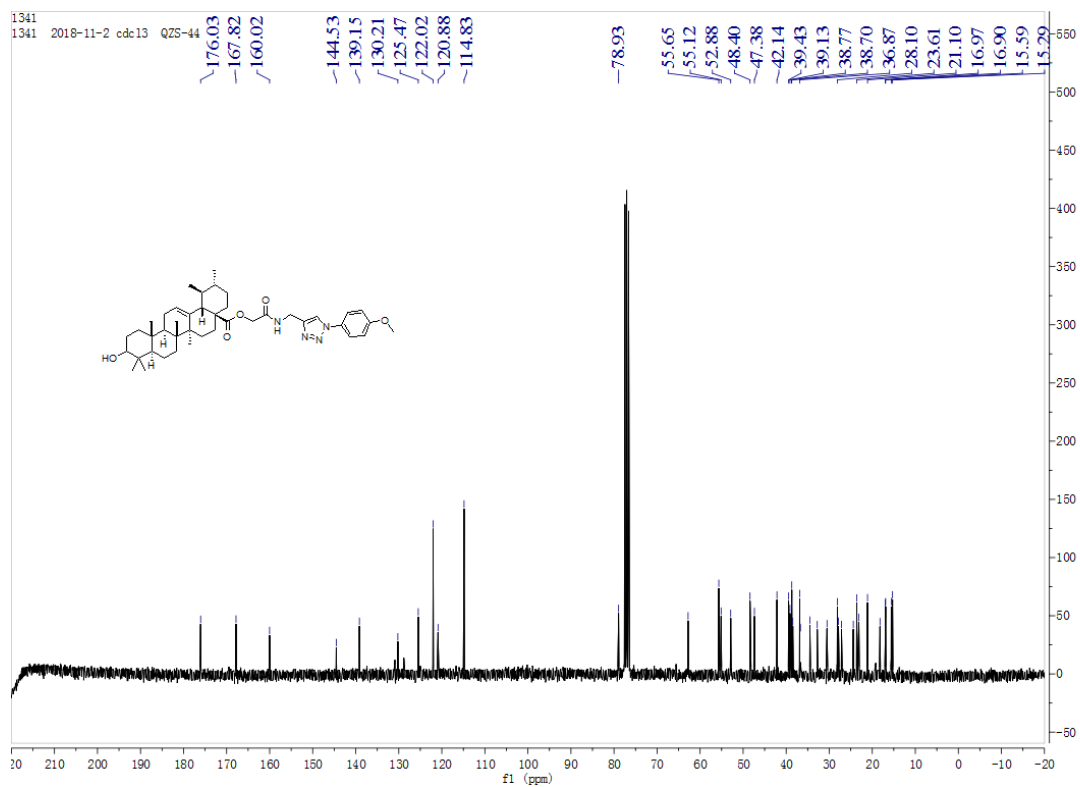

<sup>1</sup>H NMR and <sup>13</sup>C NMR spectra of compound 2c

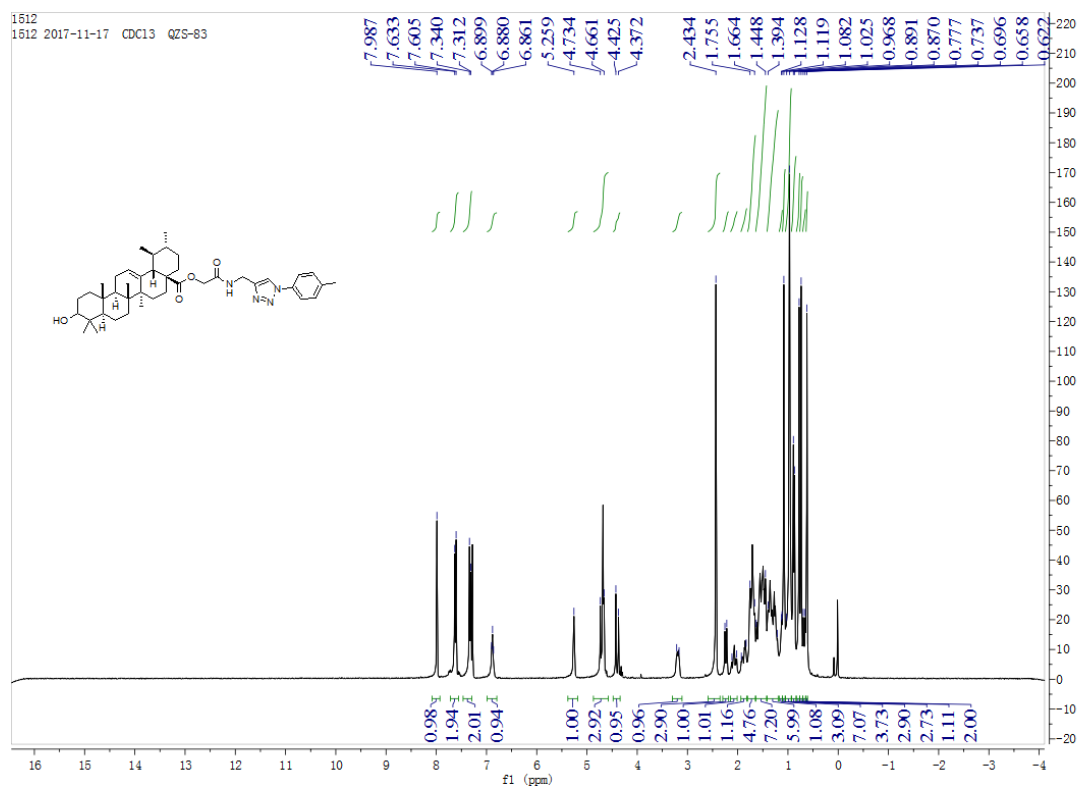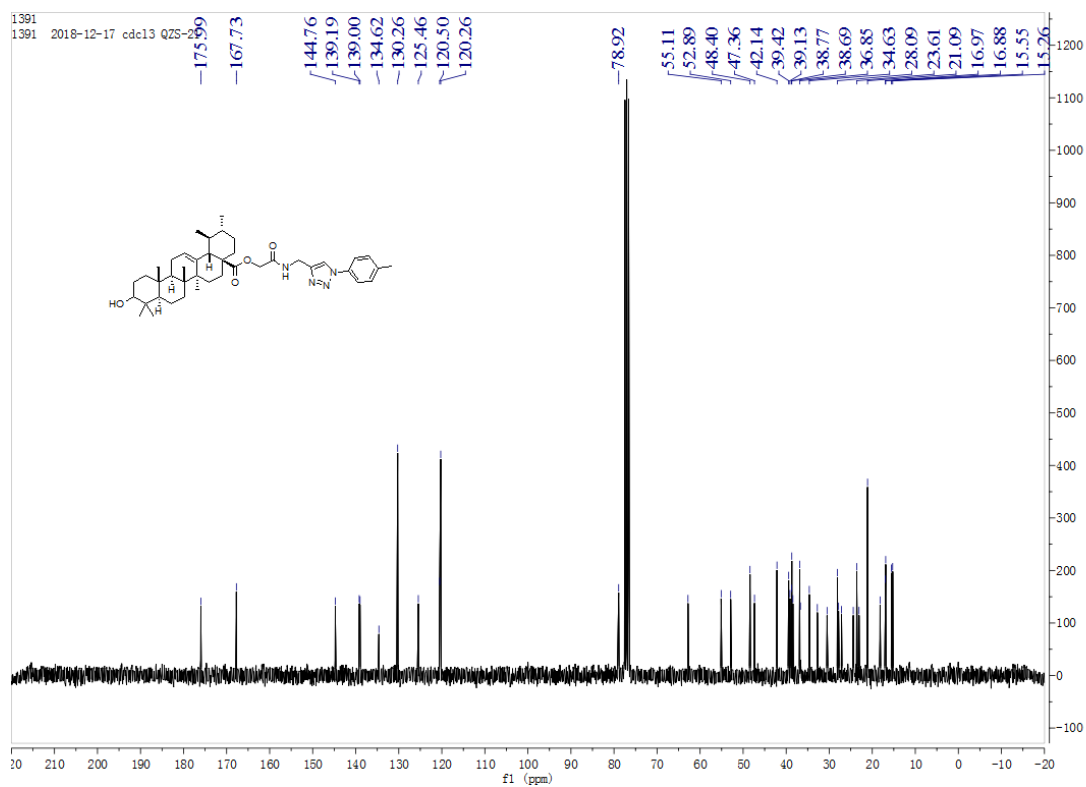

$^1\text{H}$  NMR and  $^{13}\text{C}$  NMR spectra of compound 2d



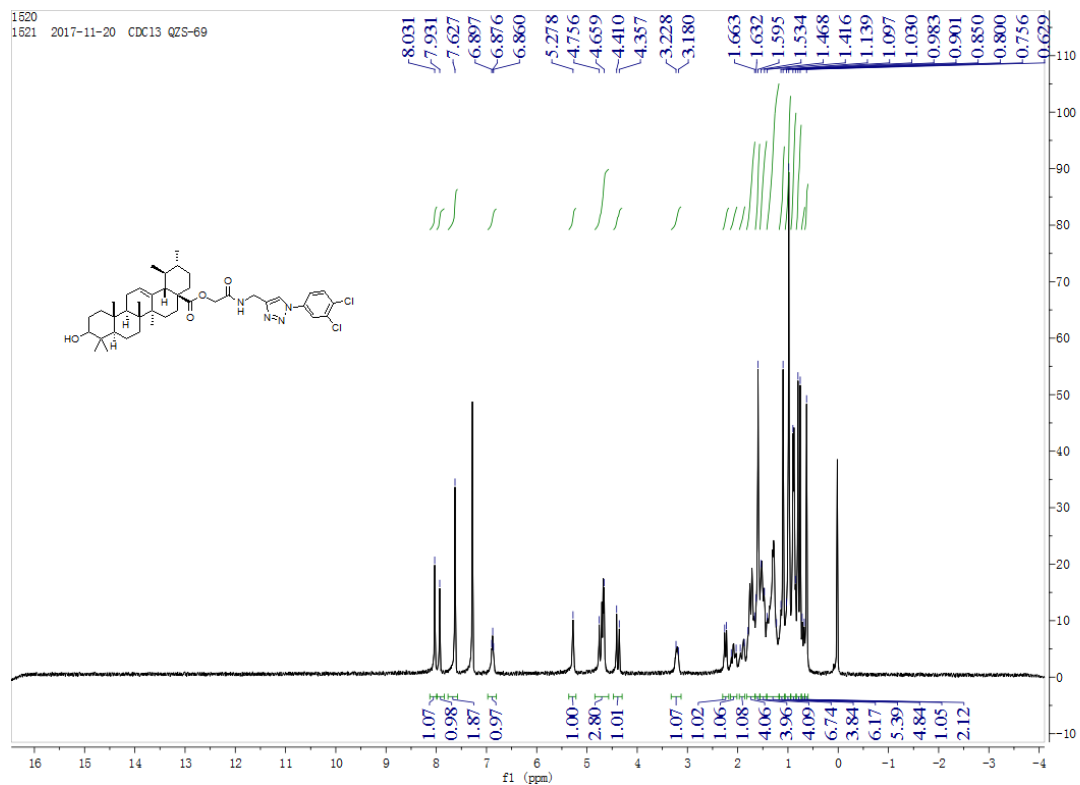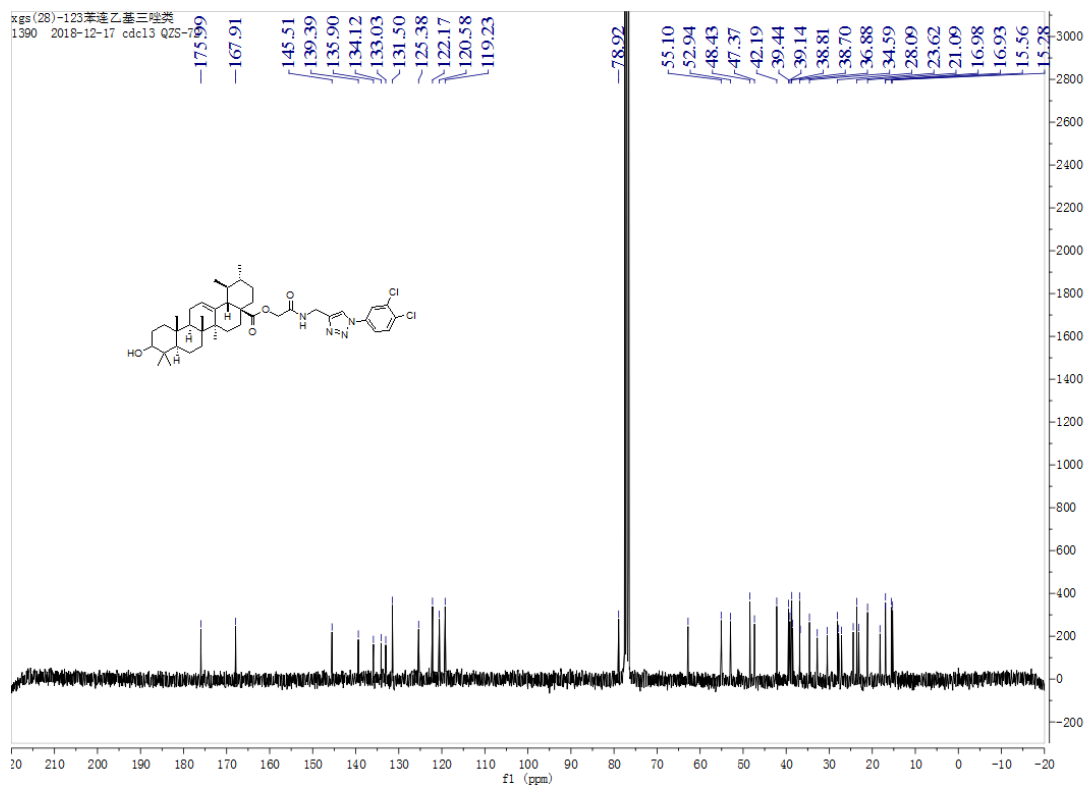

<sup>1</sup>H NMR and <sup>13</sup>C NMR spectra of compound 2e

共享  
1795 2018-4-3 CDCl3 QZS-82

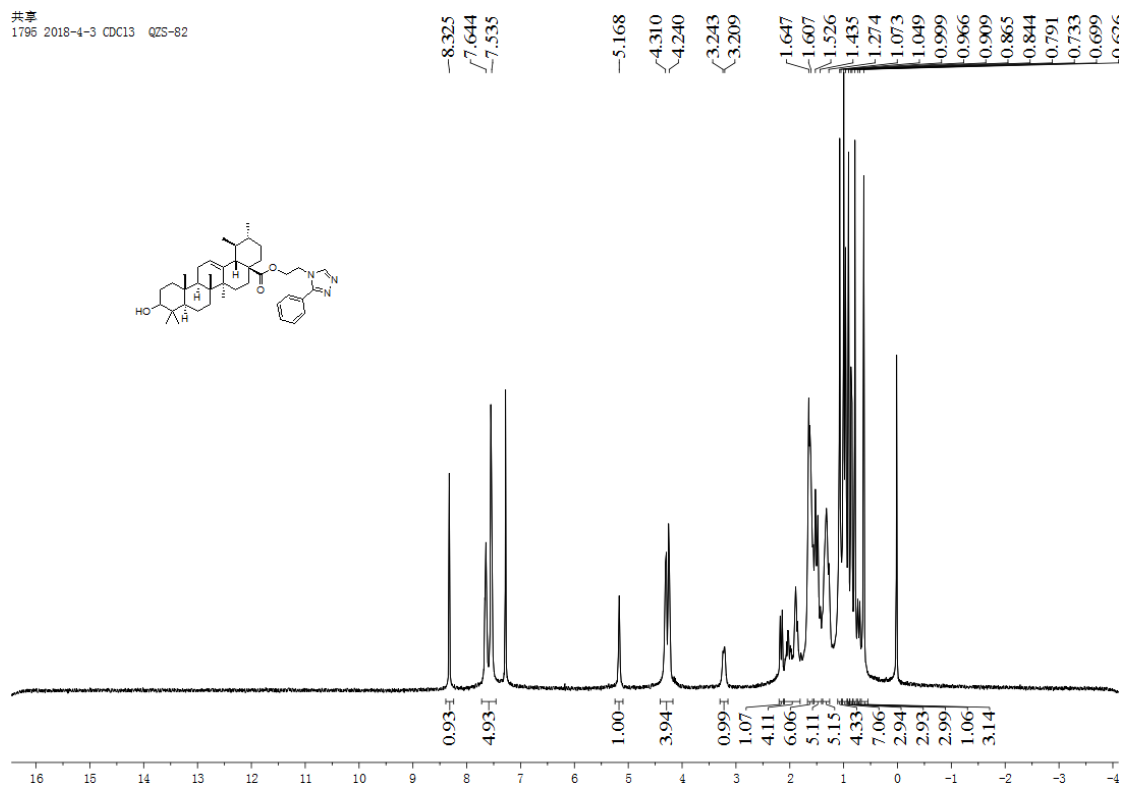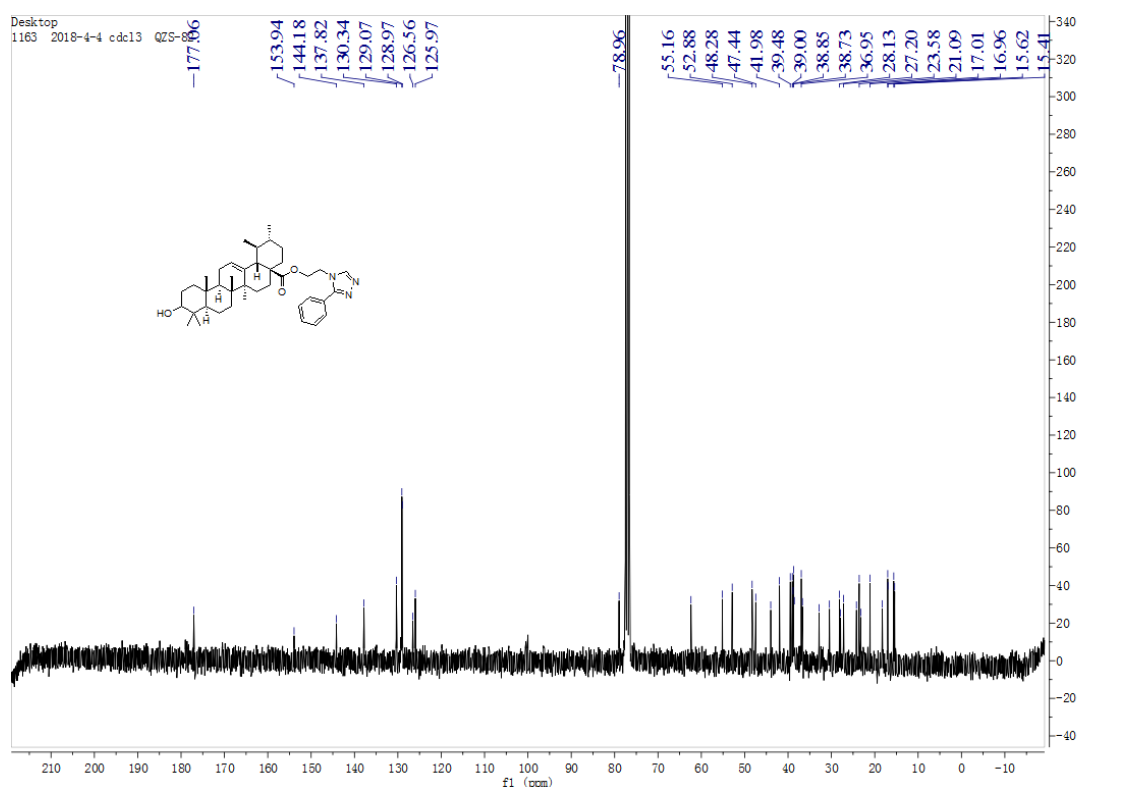

<sup>1</sup>H NMR and <sup>13</sup>C NMR spectra of compound 3a

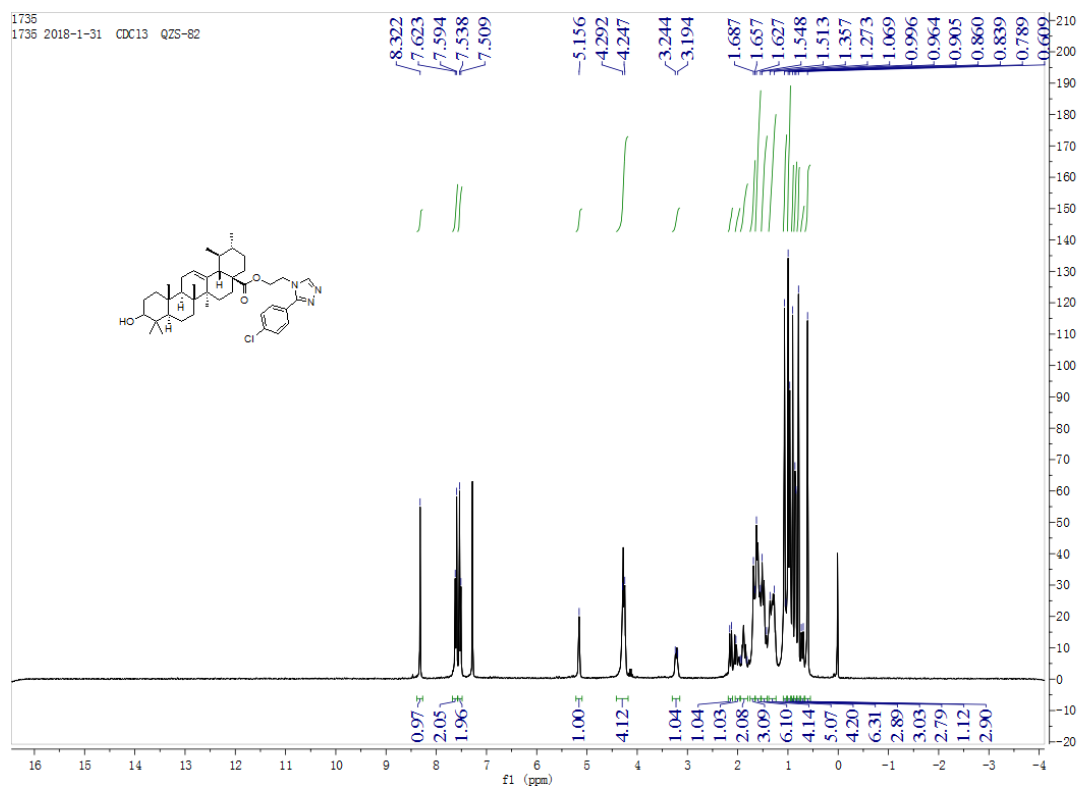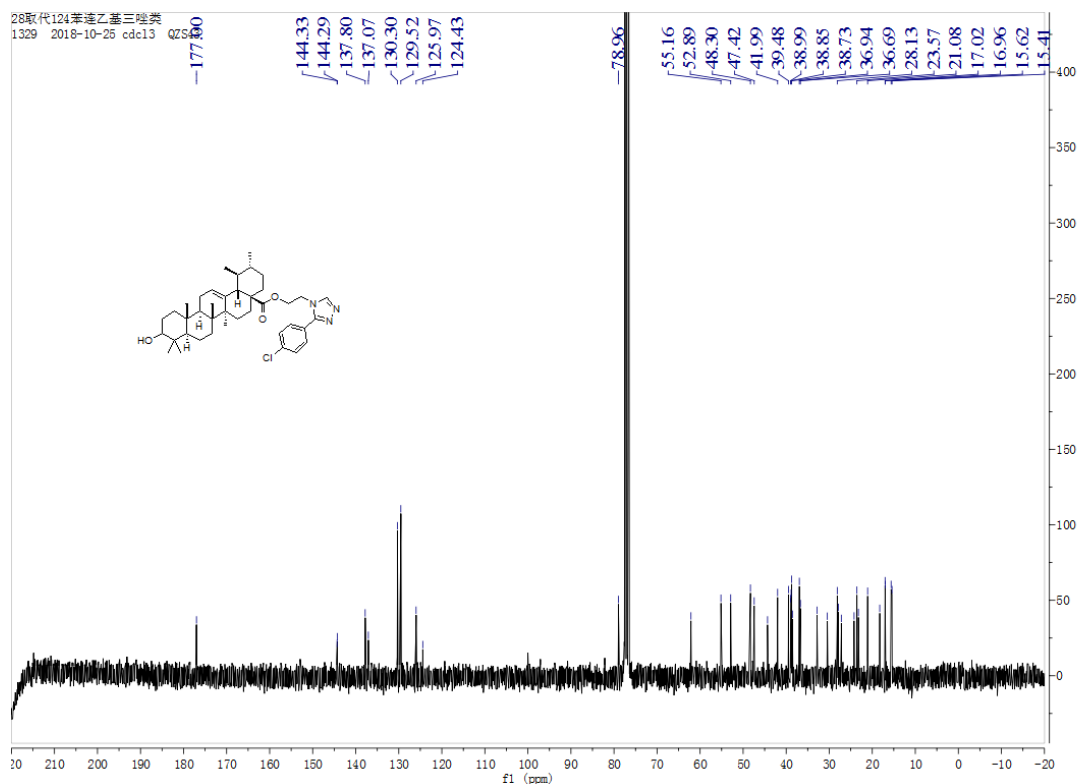

$^1\text{H}$  NMR and  $^{13}\text{C}$  NMR spectra of compound **3b**

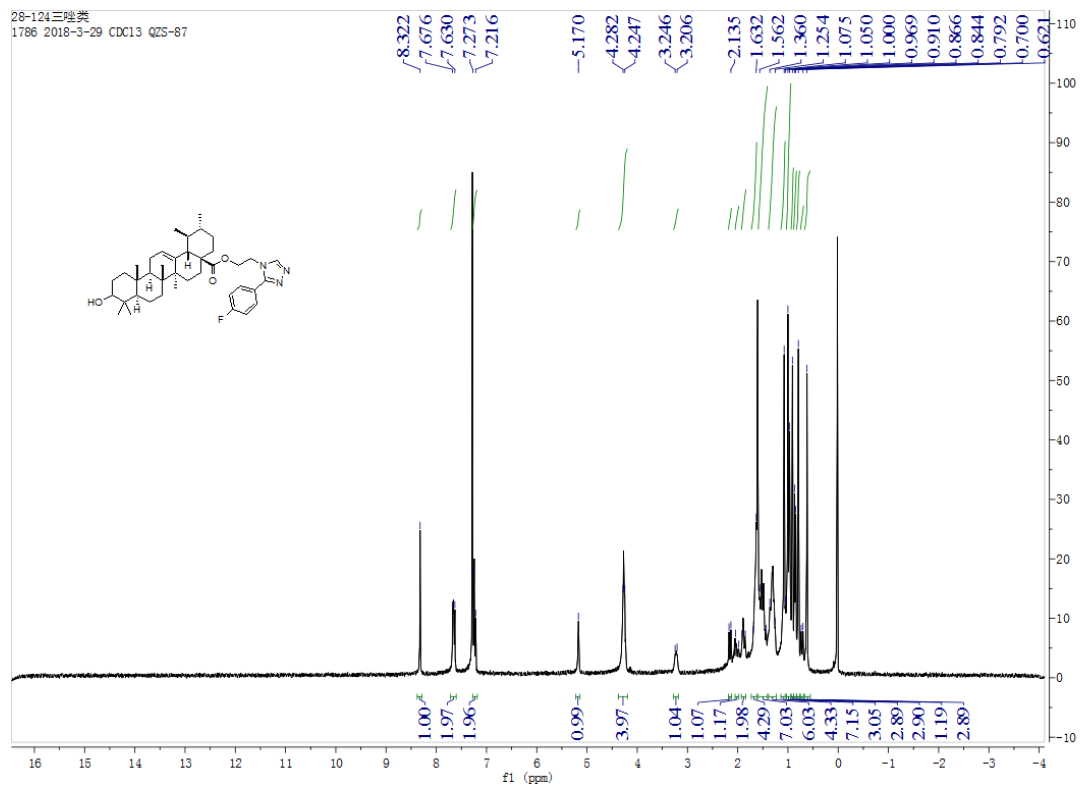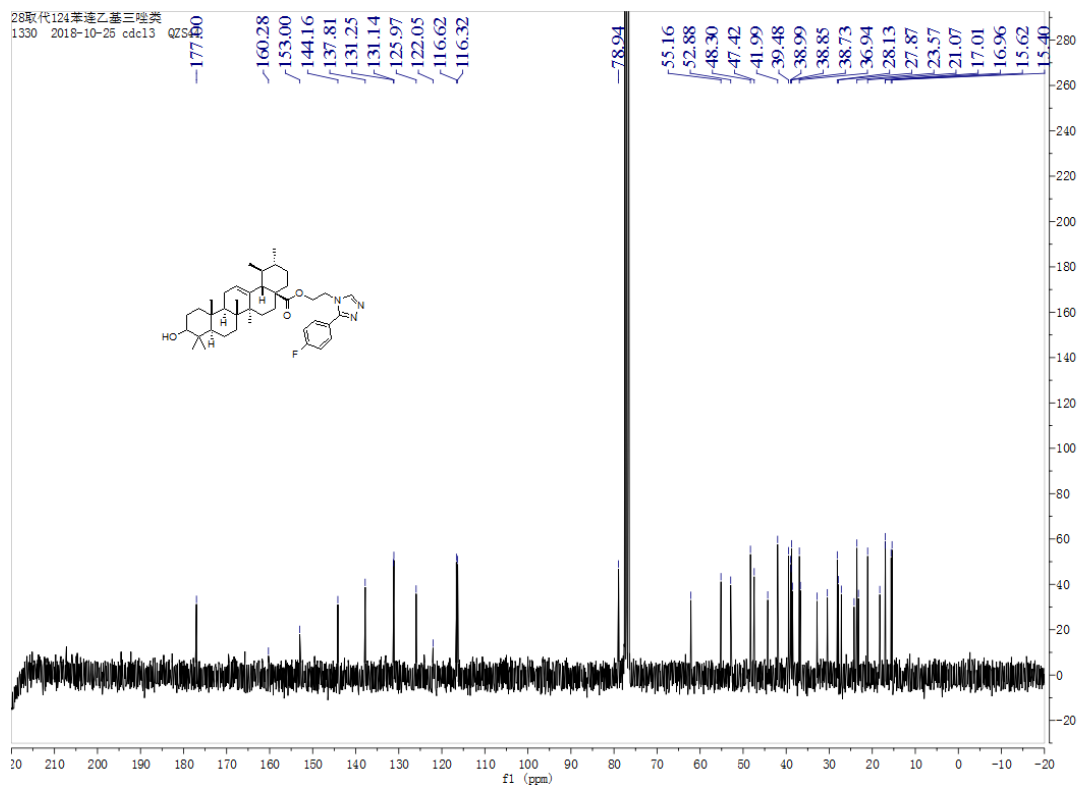

$^1\text{H}$  NMR and  $^{13}\text{C}$  NMR spectra of compound 3c

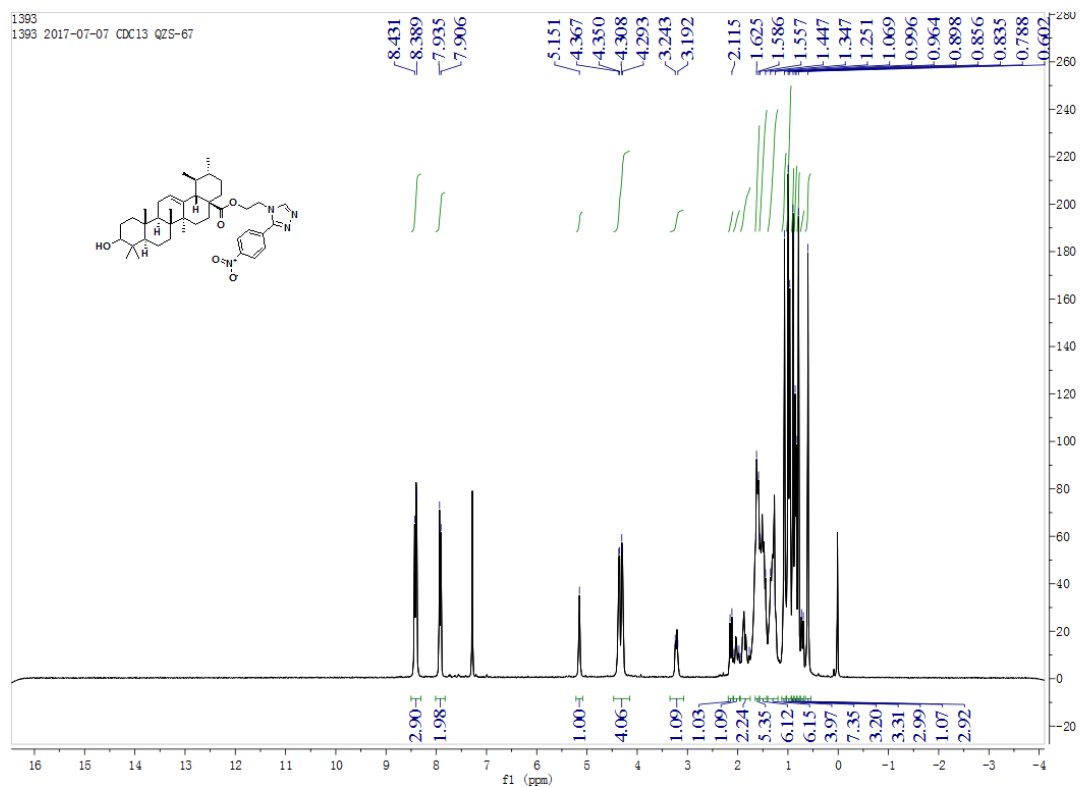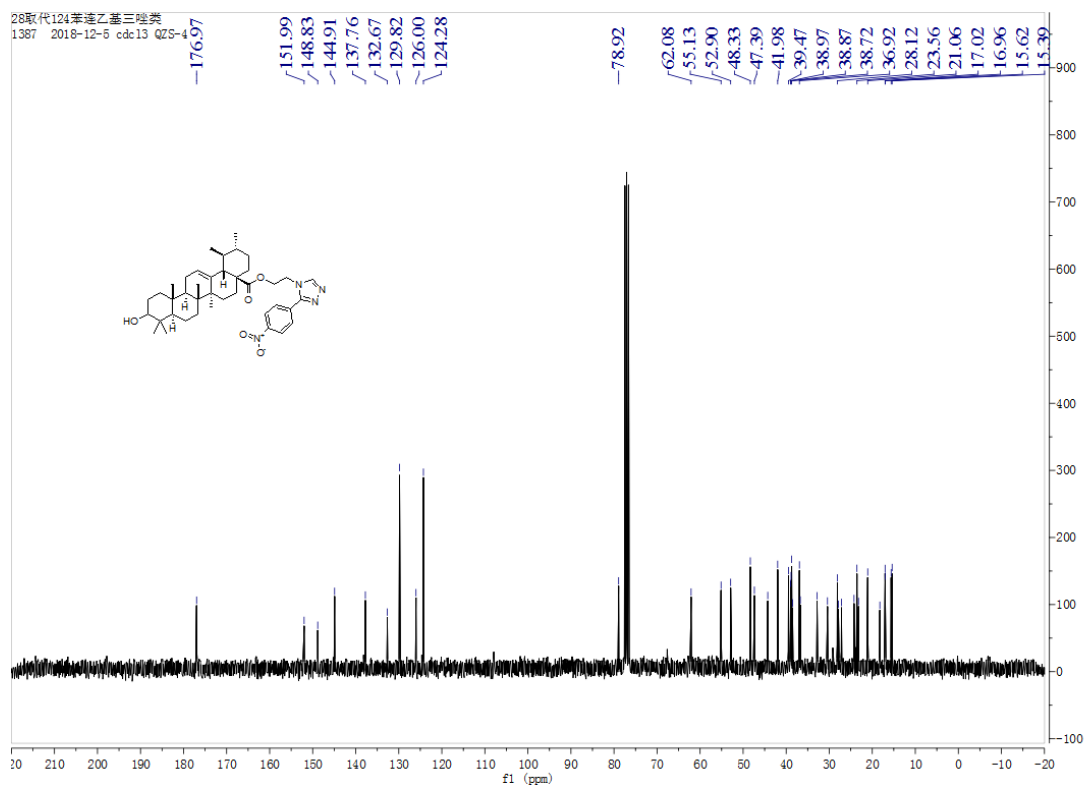

$^1\text{H}$  NMR and  $^{13}\text{C}$  NMR spectra of compound 3d

共享  
1866 2018-4-26 cdc13 QZS-89

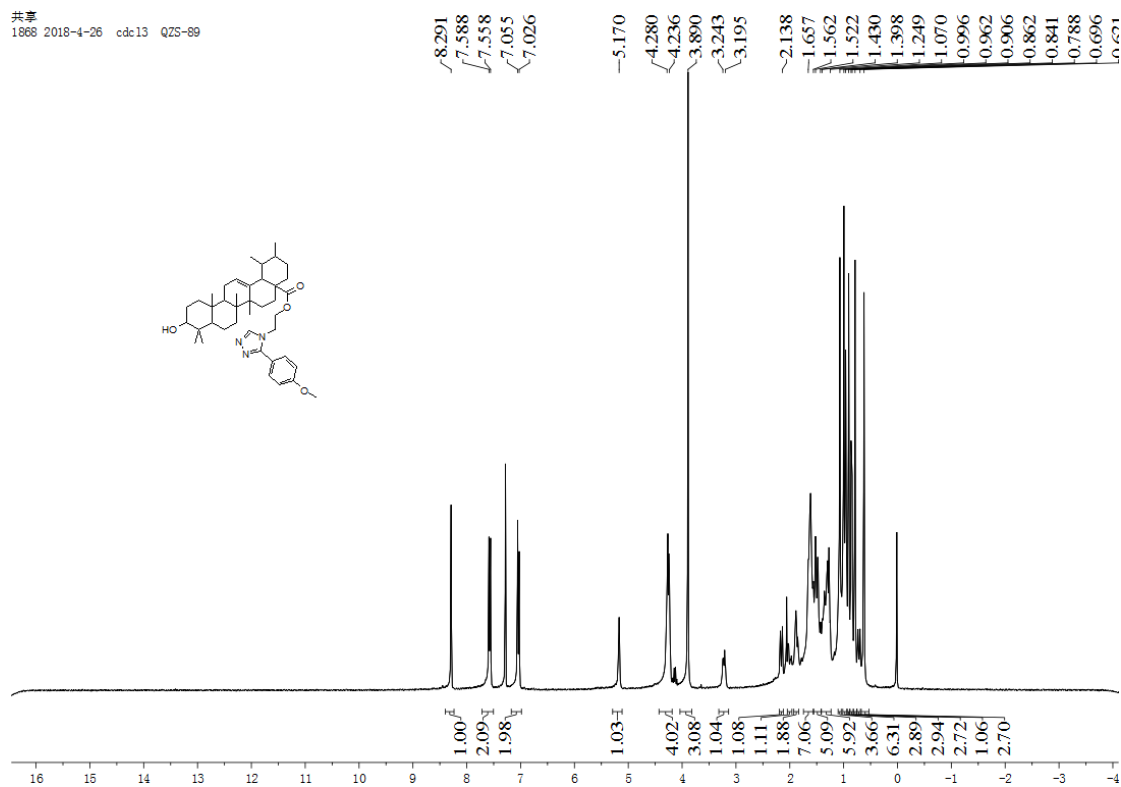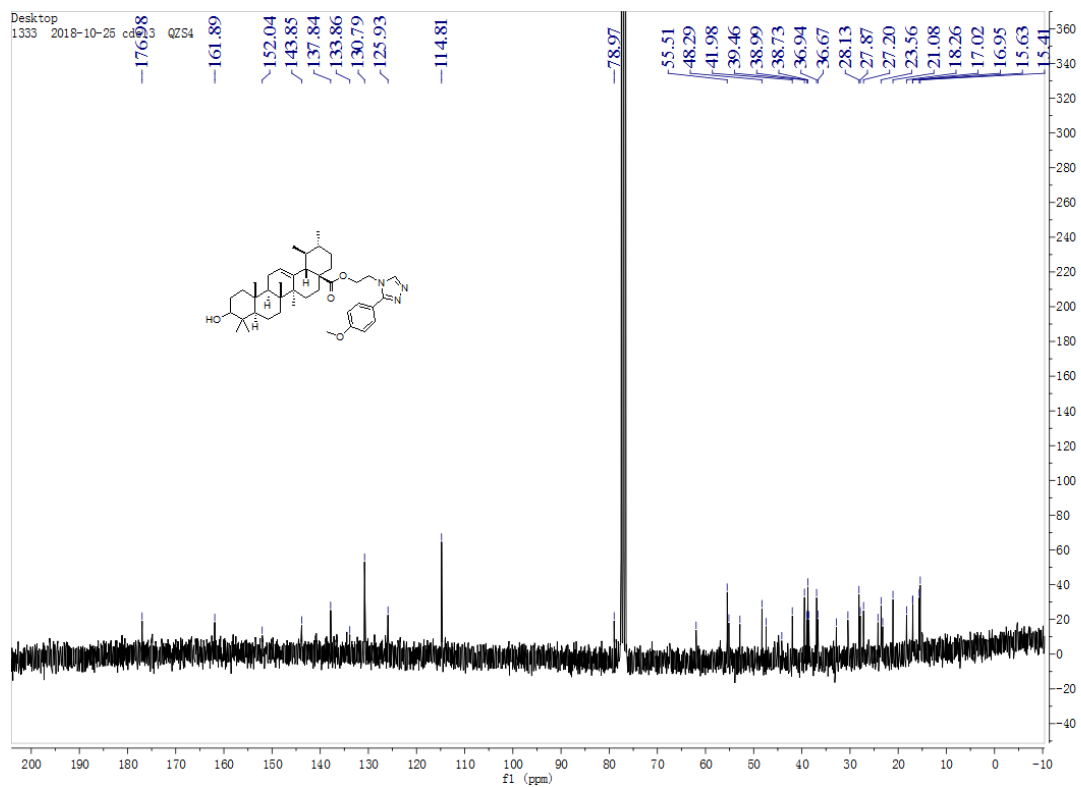

<sup>1</sup>H NMR and <sup>13</sup>C NMR spectra of compound 3e

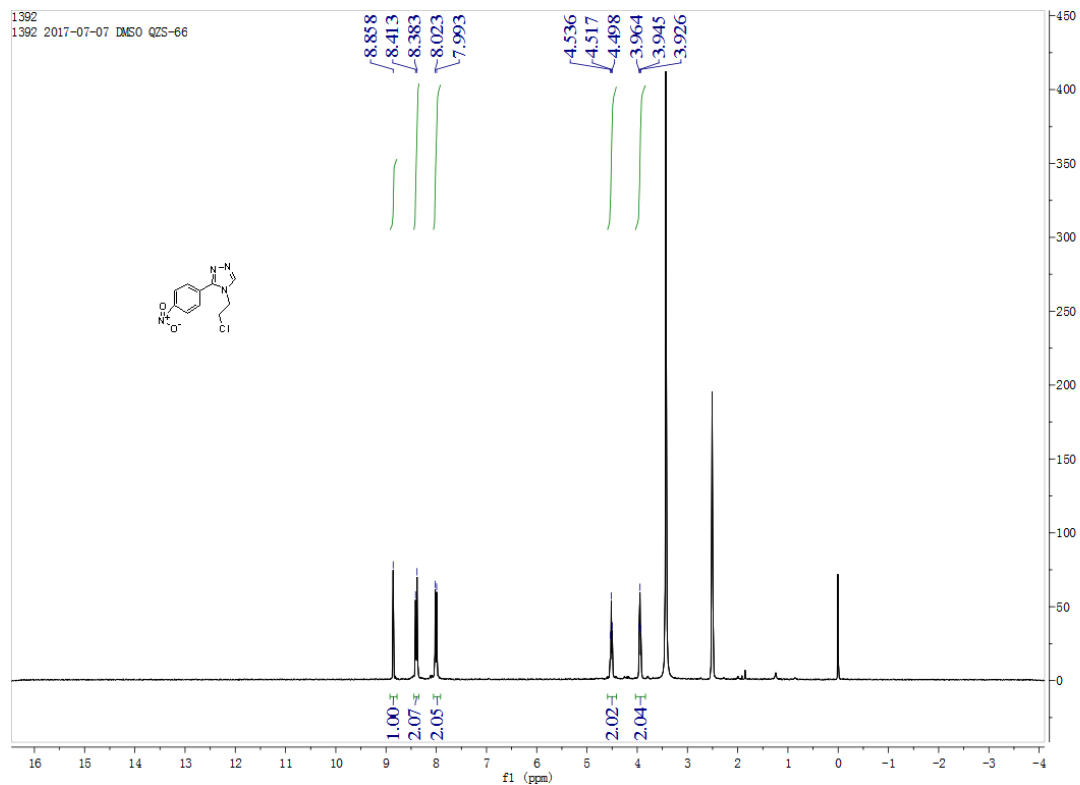

<sup>1</sup>H-NMR spectra of intermediate **IIIId**

<sup>1</sup>H-NMR (DMSO-*d*<sub>6</sub>, 300MHz, ppm): δ 8.86 (s, 1H, triazole-H), 8.40 (d, *J* = 9.0 Hz, 2H, Ar-H), 8.10 (d, *J* = 9.0 Hz, 2H, Ar-H), 4.52 (t, *J* = 5.7 Hz, 2H, -CH<sub>2</sub>-Cl), 3.95 (t, *J* = 5.7 Hz, 2H, N-CH<sub>2</sub>-).
